# Neural differentiation, selection and transcriptomic profiling of human neuromesodermal progenitors-like cells in vitro

Laure Verrier, Lindsay Davidson<sup>1</sup>, Marek Gierliński<sup>2</sup>  
Alwyn Dady and Kate G. Storey\*

Division of Cell & Developmental Biology  
School of Life Sciences, University of Dundee,  
Dow Street, DD1 5EH, Scotland, UK

\* Corresponding author: k.g.storey@dundee.ac.uk

<sup>1</sup> Human Pluripotent Cell Facility

<sup>2</sup> Data analysis group

Key words: neuromesodermal progenitor-like cells, human neural development, human spinal cord, dual SMAD inhibition, CRISPR-Cas9, human ES cells, *Nkx1.2* reporter, human neuromesodermal progenitor transcriptome,

## Abstract

Robust protocols for directed differentiation of human pluripotent cells are required to determine whether mechanisms operating in model organisms are relevant to our own development. Recent work in vertebrate embryos has identified neuromesodermal progenitors as a bipotent cell population that contributes to paraxial mesoderm and spinal cord. However, precise protocols for in vitro differentiation of human spinal cord progenitors are lacking. Informed by signalling in amniote embryos, we show here that transient dual-SMAD inhibition, together with retinoic acid (dSMADi-RA), provides rapid and reproducible induction of human spinal cord progenitors from neuromesodermal progenitor-like cells. Using CRISPR-Cas9 to engineer human embryonic stem cells with a GFP-reporter for neuromesodermal progenitor-associated gene *Nkx1.2* we facilitate selection of this cell population. RNA-sequencing was then used to identify human and conserved neuromesodermal progenitor transcriptional signatures, validate this differentiation protocol and implicate new pathways/processes in human neural differentiation. This optimised protocol, novel reporter line and transcriptomic data are useful resources with which to dissect molecular mechanisms regulating human spinal cord generation and allow scale-up of distinct cell populations for global analyses, including proteomic, biochemical and chromatin interrogation.

## Introduction

Head and trunk nervous systems have distinct developmental origins. Head or anterior neural progenitors are derived from the epiblast rostral to the primitive streak and will form regions of the brain. In contrast, progenitors of trunk or posterior neural tissue (posterior hindbrain and spinal cord) arise from epiblast adjacent to and within the anterior primitive streak (known as caudal lateral epiblast (CLE) and node streak border (NSB), respectively) (Wilson et al. 2009) (Fig. 1A). In recent years, evidence has accrued which indicates that, unlike anterior, posterior neural tissue is generated via an intermediary neuromesodermal progenitor (NMP), which contributes paraxial mesoderm as well as posterior neural tube (reviewed (Tzouanacou et al. 2009; Gouti et al. 2015; Henrique et al. 2015; Tsakiridis and Wilson 2015). Human, mouse and chick embryos as well as in vitro NMPs are identified by co-expression of early neural (*Sox2*) and mesodermal *Brachyury* (*Bra*) proteins, but as yet lack unique molecular markers (Olivera-Martinez et al. 2012; Gouti et al. 2014; Turner et al. 2014; Henrique et al. 2015; Tsakiridis and Wilson 2015). While we are beginning to uncover how mouse NMPs are regulated, human NMP-like cells and their derivatives are less well characterised, in part because this requires creation of robust in vitro models.

Most in vitro differentiation protocols are informed by our understanding of how the cell type of interest is generated during embryonic development. In the caudal end of amniote embryos, FGF and Wnt signalling act in a positive feedback loop to maintain the elongation of the body axis (Aulehla et al. 2003; Olivera-Martinez and Storey 2007; Wilson et al. 2009). FGF signalling also promotes expression of genes characteristic of CLE including the transcription factor *Nkx1.2* (Delfino-Machin et al. 2005; Sasai et al. 2014). *Nkx1.2* expression extends into the preneural tube (PNT) (Spann et al. 1994; Schubert et al. 1995; Rodrigo-Albors et al. 2016). Here preneural progenitors (PNPs) downregulate *Bra*, transcribe the early neural gene *Sox2*, but as yet do not express neurogenic genes such as *Neurog2* and *Pax6* (Scardigli et al. 2001; Scardigli et al. 2003; Bel-Vialar et al. 2007)(Fig 1A). Retinoic acid synthesized in neighbouring paraxial mesoderm mediates the transition from PNPs, repressing expression of *Fgf8* and *Wnts 8a/c* and *3a* (Shum et al. 1999; Diez del Corral et al. 2003; Sirbu and Duester 2006; Olivera-Martinez and Storey 2007; Cunningham et al. 2015) and is then further required for neurogenic gene transcription (Diez del Corral et al. 2003; Ribes et al. 2008)

In addition, to the involvement of these signalling pathways in NMP regulation, inhibition of BMP signalling is required for *Sox2* transcription in the CLE/NSB (Takemoto et al. 2006). In mouse and chick embryos, various BMP and TGF $\beta$  antagonists (*Noggin*, *Chordin* and *Follistatin*) are expressed in the anterior primitive streak, emerging notochord and newly

formed somites close to posterior neural tissue (Albano et al. 1994; Liem et al. 2000; Chapman et al. 2002). Considered together with the requirement for BMP antagonism for anterior neural induction (Hemmati Brivanlou and Melton 1997; Harland 2000; Kuroda et al. 2004; Linker and Stern 2004) the experiments of Takemoto et al. indicate an on-going requirement for BMP antagonism during the progressive generation of the posterior nervous system.

Almost all in vitro protocols for making NMP or NMP-like cells from mouse and human embryonic stem cells (hESCs) involve exposure to various durations of Wnt agonist with or without FGF (Gouti et al. 2014; Tsakiridis et al. 2014; Turner et al. 2014; Lippmann et al. 2015) and one approach has included TGF $\beta$  inhibition (to promote loss of self-renewal in human ESC and repress mesendoderm differentiation, after (Chambers et al. 2009; Denham et al. 2015). It is well established that efficient induction of anterior neural tissue from hESCs is achieved by exposure to inhibitors of both TGF $\beta$  and BMP signalling (known as dual-SMAD inhibition)(Chambers et al. 2009). However, a role for BMP inhibition in the differentiation of neural tissue from NMPs in vitro has not been assessed. Here we show that neural differentiation from human NMP-like cells is promoted by transient dual-SMAD inhibition. We deploy CRISPR-Cas9 engineering to make a reporter for enrichment for human NMP-like cells and provide the first transcriptomic profiling of this cell population and derived spinal cord progenitors.

## Results and Discussion

### Robust differentiation of human NMP-like cells into posterior neural progenitors by inclusion of transient dual SMAD inhibition

In human ESCs, the simplest approach to make NMP-like cells involves removal of self-renewal conditions and exposure to FGF and the Wnt agonist CHIR99021 for 3 days. The cells generated in this way were then differentiated into neural progenitors by day 6, following replating and culture in basal media alone (Gouti et al. 2014). We first assessed the reproducibility of this protocol to generate *Pax6* expressing neural progenitors. Culturing hESCs in Neurobasal supplemented with 1x N2, 1x B27 medium bFGF (20 ng ml<sup>-1</sup>) and CHIR99021 (3 $\mu$ M) for 3 days readily generated Sox2/Bra co-expressing NMP-like cells (Figs. S1A, B). However, subsequent differentiation after cell dissociation and re-plating in just Neurobasal / 1x N2 / 1x B27 at the end of day 3 (D3), did not generate *Pax6* positive cells by end of day 6 (D6) (assessed in two hESC lines, SA121 and H9) (Figs S1 C, D). We then carried out a series of experiments aimed at inducing prompt neural differentiation as indicated by expression of *Pax6* by D6. Introduction of all-trans retinoic acid (RA) 100nM from the beginning of the neural differentiation protocol



on day 4 (D4) was not sufficient in either cell line (Figs S1C,D). This inability to induce prompt *Pax6* expression from NMP-like cells might reflect inherent differences between hESC lines, but may also involve variant culture conditions, including the extent of cell dissociation on re-plating following NMP-like cell induction. This may influence cell-cell signalling and could mimic inhibition of BMP signalling, as reported on dissociation of *Xenopus* animal cap ectoderm (Wilson and Hemmati-Brivanlou 1995). Furthermore, exposure to dual SMAD inhibitors (dSMADi) and so attenuation of BMP and TGF $\beta$  receptor type 1 signalling is known to promote anterior neural differentiation of hES cells following removal of self-renewal conditions (Chambers et al. 2009). Informed by the timing of exposure to endogenous TGF $\beta$  inhibitors experienced by cells in the CLE and PNT in the amniote embryo (Fig. 1A), we next introduced Noggin 50 ng/ml and the TGF $\beta$  receptor type 1 inhibitor SB431542 10  $\mu$ M from the beginning of D3 to the end of D4. This step did not alter induction of NMP-like cells on D3, (Fig. 1B' and see flow cytometry data Fig. S2) and in combination with subsequent exposure to RA from D4, robust *Pax6* expression was induced by D6 (Fig. 1C). Importantly, inclusion of either Noggin or SB431542 alone with RA was not effective (Fig. 1D), indicating that dual SMAD inhibition is required to augment neural differentiation in this context. The reproducibility of this protocol (Fig. 1B) was further demonstrated by rapid induction of *Pax6* in a hiPSC line (Fig. S3: ChiPS4).

To characterize this dSMADi-RA differentiation protocol we analyzed the expression dynamics of key cell state marker genes using quantitative reverse transcription PCR (RT-qPCR). Pluripotency genes *Nanog* and *Oct4* were dramatically reduced from hESC to D3(NMP-like) and transcripts were lost quickly as these cells differentiated (Fig. 2A), as observed in mouse and chick embryo and mouse ESC-derived NMPs (Tsakiridis et al., 2014, Gouti et al., 2014). D3(NMPs) were characterized by high-level *Bra* and *Cdx2* transcription (Fig 2B). As in mouse ES cell-derived NMPs, *Sox2* transcripts were lower in D3(NMP-like cells) than in hESCs, despite high-level *Sox2* protein in mNMPs (Gouti et al 2014; Turner et al 2014) (Fig. 1F, 2B). *Cdx* genes regulate signalling that maintains the mouse NMP cell state and also induce expression of posterior Hox genes, which confer anterior-posterior identity (Young and Deschamps 2009; Young et al. 2009; Gouti et al. 2017). NMP-like cells expressed *Hoxb4* and little *Hoxc6* (Fig. 2C) and together with subsequent RNASeq analysis (see below) which revealed transcription of Hox gene paralogues only within a range from a1 to a7 on D3, this suggests that these cells are equivalent to mouse embryo E7.5-8.5 CLE/NSB cells, which co-express Hox genes across this range (Huang et al. 1998; Yu et al. 1998). The anterior boundary of Hox a7 defines cervical/thoracic boundary at later stages, suggesting that hNMP-like cells and their derivatives

generated with this protocol possess an anteroposterior identity in this region (Fig. 2C). In the embryo, differentiation from NMPs to neural progenitors involves downregulation of *Bra* and entry into a transitional preneural cell state (Fig. 1A), which is characterized by persisting expression of *Wnt8a/c* and *Nkx1.2* (Fig. 2D). As these genes decline *Pax6* is then transcribed, rising to a peak at D8 (Fig. 2E). This suggests that neural progenitors arise between D5 and D8. This protocol therefore provides an assay in which to investigate the human NMP-like cell state and how this alters to form spinal cord progenitors.

### Generation of a human *Nkx1.2* reporter cell line

Cell populations generated in vitro are inevitably heterogeneous and so we next made a reporter line that could be used to enrich for NMP-like cells. We took advantage of CRISPR/Cas9 technology (Komor et al. 2017) to engineer H9 hESCs to express GFP under the control of the endogenous *Nkx1.2* promoter. This homeo-domain containing transcription factor is highly expressed in NMPs (CLE and NSB) in the mouse embryo and is detected at lower levels in the cells becoming neural progenitors (preneural cells) or cells ingressed into the primitive streak and is then lost in neural and mesodermal progenitors (Fig. 1A, 2D) (Spann et al. 1994; Schubert et al. 1995; Rodrigo-Albors et al. 2016). We reasoned that selection for high *Nkx1.2* expression on D3 when *Bra* transcripts are high would enrich for NMP-like cells. To this end a GFP-T2A sequence (Kim et al. 2011) was knocked-in to the *Nkx1.2* locus in-frame just upstream of exon1 (Fig 2F and see Methods). Correct targeting was confirmed by PCR across the integration site and subsequent fragment sequencing (Figs 2G, S4). Whole genome sequencing and structural variation analysis of this data further confirmed that the *Nkx1.2* gene was the only locus modified by integration of GFP-T2A (Fig. 2H). Using CRISPR-Cas9 approach we thus generated a GFP-*Nkx1.2* hESC line bearing a mono-allelic insertion of the GFP-T2A specifically in the *Nkx1.2* locus.

Differentiation of this GFP-*Nkx1.2* reporter line using the dSMADi-RA protocol was then characterized by Western blot; revealing GFP expression up to day 5 (Fig 2I), including low-level GFP in hESC, (consistent with detection of *Nkx1.2* in H9 hESCs) (Fig. 2E). Flow cytometry (without GFP antibody) further confirmed GFP expression at D3 in GFP-*Nkx1.2* cells compared with auto-fluorescence profile of wild-type H9 differentiated in parallel, which was then lost as cells differentiate (D7) (Fig. 2J). To confirm that *Nkx1.2* locus modification did not impair differentiation we used immunocytochemistry and flow cytometry to assess Sox2/*Bra* co-expression on D3 (Fig. S2) and RT-qPCR (Fig. S5) to profile expression of marker genes during dSMADi-RA differentiation. These analyses indicated that the engineered line made NMP-like

cells and that its differentiation was comparable to that of the parental H9 line (Figs S2, S5, 2A-E). Similar results were obtained with a second GFP-Nkx1.2 line, demonstrating the reproducibility of this approach (Fig. S6).

### Identity and conservation of human NMP transcriptional signature

We next used this GFP-Nkx1.2 cell line to select for high GFP-expressing cells on D3 using FACS (see Materials and Methods) and generated RNA-Seq data for D3. This was compared with RNA-Seq data for D8 NPs (not subjected to prior selection) and published RNA-Seq data for H9 hESCs (Chu et al. 2016). This included expected NMP-associated genes *Bra*, *Cdx1*, *Sp5*, *Wnt8A/C*, *Fgf17*, but also new genes, such as membrane protein of unknown function *Unc93a* and *GPRC5a*, an orphan G-protein-coupled receptor responsive to retinoid signalling (Cheng and Lotan 1998). Some enriched genes (*Fgf17*, *GPRC5A*, *Unc93A*) were then validated by RT-qPCR, including a gene not in the top list (*Shisha3*), which attenuates FGF and Wnt signalling (Yamamoto et al. 2005) (Fig. 3B).

This human D3-NMP-like gene list was next compared with that for genes uniquely upregulated in *in-vitro*-derived mNMPs (Gouti et al. 2014). This identified 31 conserved genes (Fig. 3C). These include transcription factors known to be expressed in mNMPs, *Bra*, *Nkx1.2* and *Mixl1*, but also newly implicate *Mkx* (mohawk /Irx1L), (Liu et al. 2006), *Alx3* (Beverdam and Meijlink 2001) and *Runx3* as transcriptional regulators. Predicted signalling pathways, Wnt (*Wnt8A*, *Wnt5A*, *Dkk4*) and TGF $\beta$  antagonism (*Fst*, *Follistatin*) were also represented, along with genes implicating new signalling activities. These include 4 solute carriers (SLC13A5, SLC38A8, SLC43A1, SLC6A7). *SLC6A7* is a member of the gamma-aminobutyric acid (GABA) neurotransmitter gene family and two further genes mediating GABAergic signalling are also conserved: *GAD1* (glutamic acid decarboxylase), which synthesizes GABA from glutamate and is transcribed in the mouse tailbud (Maddox and Condie 2001) and GABA receptor *GABBR2*/GPRC3B. In neurons, GABA-B receptors can trigger inactivation of voltage-gated calcium channels (Padgett and Slesinger 2010). Two further conserved NMP genes, *CACNA1C* (a calcium-channel auxiliary subunit/CaV1.2) implicated in maintaining calcium-channel inactivation (Soldatov et al. 1997) and *ATP2A1* (a calcium transporting ATPase) which maintains low cytoplasmic calcium (Shull et al. 2003), may additionally operate via different mechanisms to restrict intra-cellular calcium. This is consistent with the requirement for calcium signalling for neural induction, as indicated by *Sox2* transcription, in chick embryos (Papanayotou et al. 2013). Indeed, *Sox2* transcripts are characteristically low in mNMPs (Gouti et al 2014). To test this predicted increase in calcium signalling during neural differentiation we assessed this in D3

NMP-like cells and D8 neural progenitors using a fluorescence based reporter (Fluo3-AM), which binds free intracellular  $\text{Ca}^{2+}$  (Tsien 1981). This revealed elevated calcium signalling in neural progenitors cells in comparison with NMP-like cells (Fig. S7).

As there are not only species differences between these data sets, but also in vitro protocol variation, we additionally compared the human D3/NMP-like molecular signature with those obtained for mouse embryonic NMPs at E8.5 and E9.5 using single-cell-RNA-Seq (Gouti et al. 2017). This identified 23 conserved genes (Fig. 3D). This again included *GAD1* and another GABA receptor, *GABRG1*, belonging to the type-A family, shown to regulate stem cell proliferation (Andang et al. 2008). GABA biosynthesis is an output of the tricarboxylic acid (TCA) cycle, input to which can come from glycolytic metabolism, which was recently shown to operate in tailbud progenitor cells (Bulusu et al. 2017; Oginuma et al. 2017). It will therefore be important in the future to understand the relationship between this metabolic state and GABA production in axial progenitors (Fig. 3D).

### Transcriptomic characterization of the differentiation protocol

These RNA-Seq data also helped to characterize cell types generated with the dSMADi-RA differentiation protocol. The mesendoderm marker *Sox17* was not detected, nor were transcripts from anterior neural genes (*Foxg1*, *En2* and *Dlx2*) in any condition (<10 reads), while *Otx2*, which is initially expressed in the early epiblast and primitive streak (Ang et al. 1996; Henrique et al. 2015), declines sharply from hESCs (Fig. 4A). This is not surprising given hESC exposure to FGF and Wnt signalling for 3 days to generate NMP-like cells, at which time cells begin to express a range of *Hox* genes, including *a1*, *b4* and *a7*, (Fig. 4B). In this assay, therefore, NMP-like cells possess a posterior identity prior to their direction along the neural differentiation pathway. Components of signalling pathways known to regulate embryonic NMPs, reviewed in (Henrique et al. 2015), exhibited expected gene expression profiles (Figs 4C, D, E). High-level transcription of neural progenitor and neurogenic genes (Fig 4F) was detected on D8 and correlated with increased retinoid signalling reported by *RARb* transcription (Fig. 4G). The expression of both BMP and Shh pathway genes (Fig. 4H,I) on D8 suggested that induced spinal cord progenitors are exposed to dorsal (BMP) and ventral (Shh) patterning signals. However, while dorsal neural progenitor and neural crest associated genes were expressed along with some more ventral progenitor genes (Fig. 4J), ventral-most markers *Nkx2.2* and floor plate marker *FoxA2* were not detected at D8. The early transcription of neural crest genes in this differentiation assay further suggests that, as in the elongated embryonic

body axis and in mouse ES-derived *in vitro* spinal cord assays, dorsal progenitor cell types emerge prior to ventral progenitors (Meinhardt et al. 2014).

To establish whether ventral cell types, such as motorneurons, can be derived from day 3 NMP-like cells we further adapted the neural differentiation regime, after (Amoroso et al. 2013), including extension of the culture period to 21 days. This reproducibly generated motorneurons, identified as cells co-expressing *Islet1* and *HB9* (Figure S8).

Guided by signalling in model vertebrate embryos we have devised a protocol for the robust differentiation of human spinal cord progenitors from NMP-like cells, which could be further differentiated in to expected spinal cord cell types, such as motorneurons. This protocol can be used for future mechanistic and translational approaches, including development of human neuroepithelial cell behaviour assays. The GFP-*Nkx1.2* reporter line allowed selection of high *Nkx1.2* expressing cells on D3 and has the potential to be further engineered to report for *Bra*, select for later *Nkx1.2*+/*Bra*- cells and so identify early changes in neural differentiation. These RNA-Seq data not only served to validate this differentiation protocol and uncover a conserved NMP-like transcriptional signature, but also identified potential new signalling pathways, including those mediated by GABA and calcium, involved in the regulation of the NMP cell state.

## Materials and Methods

### Human ES cell culture and differentiation

Human ES cells (H9, WiCell; SA81, SA121 both Cellartis AB) and human iPS cells (ChiPS4, Cellartis AB) were maintained as feeder-free cultures in DEF medium (Cellartis AB) supplemented with bFGF (30 ng/mL, Peprotech) and Noggin (10 ng/mL, Peprotech) on fibronectin (Millipore, 5  $\mu\text{g cm}^{-2}$ ) coated plates, and enzymatically passaged to single cells using TrypLE select (Life Technologies) according to the manufacturers recommendations. Metadata for quality control and passage numbers for all pluripotent stem cells (PSC) used in this study are provided in Supplementary Data 1. For single cells passaging, the medium was supplemented by addition of the Rho kinase inhibitor Y-27632 (10  $\mu\text{M}$ , Tocris). All experiments with hESCs were approved by the UK Stem Cell Bank steering committee (SCSC14-28 and SCSC14-29).

For differentiation assays, PSC were plated on Geltrex matrix (20  $\mu\text{g cm}^{-2}$ , Life Technologies) at a density of  $4 \times 10^4$  cells  $\text{cm}^{-2}$  in DEF medium supplemented with bFGF, Noggin and Y-27632 as above, and cells allowed to attach for 24 hours. To start differentiation, the medium was changed to Neurobasal supplemented with 1x N2, 1x B27 supplements (all Life Technologies), Chiron99021 (3  $\mu\text{M}$ , Tocris) and bFGF (20  $\text{ng ml}^{-1}$ ) and cells incubated for 48 hours. The medium was then changed to Neurobasal supplemented with 1x N2, 1x B27, Chiron99021 (3  $\mu\text{M}$ , Tocris), bFGF (20  $\text{ng ml}^{-1}$ ), Noggin (50  $\text{ng ml}^{-1}$ ) and SB431542 (10  $\mu\text{M}$ , Tocris) and cells incubated for a further 24 hours to obtain NMP-like cells.

For further differentiation, NMP-like cells were dispersed using PBS-EDTA 0.5 mM and seeded at a density of  $2 \times 10^5$  cells  $\text{cm}^{-2}$  on Geltrex matrix (20  $\mu\text{g cm}^{-2}$ ) in Neurobasal supplemented with 1x B27, 1x N2, all-trans retinoic acid (100 nM, Sigma Aldrich) and Y-27632 (10  $\mu\text{M}$ , Tocris), and allowed to attach overnight. Cells were then cultured in Neurobasal supplemented with 1x N2, 1x B27 and all-trans retinoic acid (100 nM) for the indicated time to obtain later stage progenitors.

NMP-like cells were differentiated into motoneurons using a protocol adapted from (Amoroso *et al.* 2013). Briefly, day 3 NMP-like cells were replated as described above and allowed to attach overnight. The medium was then changed to Neurobasal supplemented with 1x N2, 1x B27, all-trans retinoic acid (100 nM), L-Ascorbic acid 2-phosphate (400 nM, Sigma Aldrich) and BDNF (20  $\text{ng ml}^{-1}$ , Peprotech) and the cells cultured for 48 hours. The medium was then further supplemented by the addition of C25II Shh (20  $\text{ng ml}^{-1}$ , Dundee Cell Products) and cells cultured for 17 days changing the medium every 48 hours.

## RTqPCR

Total RNA was extracted using the RNEasy mini kit (Qiagen), following the manufacturer's instructions, with the addition of a DNase digestion step performed on the column for 15 min with RQ1-DNase (Promega). After initial denaturation for 5 min at 70°C in presence of 1  $\mu\text{g}$  random primers, 500 ng of RNA per sample were reverse transcribed for 1h in 20  $\mu\text{L}$  reaction volume containing 0.5 mM dNTPs, 5 mM  $\text{MgCl}_2$ , 1X ImProm-II RT buffer, 20 U RNasin and 160 U of ImProm-II RT (Promega). Samples were incubated for 15 min at 70°C to stop the reaction. qPCR analysis was performed using primers described in table 6 on either a Mastercycler RealPlex2 (Eppendorf) or an AriaMX (Agilent) device in presence of PerfeCTa SYBR Green SuperMix for iQ (Quanta Biosciences) or BrilliantIII SYBRgreen PCR MasterMix (Agilent) respectively. Relative expression was calculated using the  $\Delta\Delta\text{Ct}$  method, normalizing each gene of interest to *Gapdh* levels.

### Western blot

Western blots were performed using standard protocols. Briefly, proteins were extracted using RIPA buffer (150 mM sodium chloride, 1.0% Triton X-100, 0.5% sodium deoxycholate, 0.1% SDS (sodium dodecyl sulphate) and 50 mM Tris, pH 8.0). Cell extract was incubated on ice for 30 min in presence of DNase (Universal Nuclease, Pierce) and spun down for 20 min at full speed. Protein concentration in supernatant was determined using a Bradford Assay with a BSA standard curve ranging from 0-2 mg/ml. The samples were diluted in NuPage 4x sample buffer (LifeTechnologies) and loaded onto a 4-12% gradient gel (Novex NuPAGE, LifeTechnologies). Western blots were performed using standard procedures and antibodies used at the following concentrations: anti-GAPDH 1  $\mu\text{g}/\text{mL}$  (ab9484, abcam), anti-GFP 1  $\mu\text{g}/\text{mL}$  (ab6673, abcam). Detection was performed with anti-goat Dylight 6800 conjugate (1:10000, LifeTechnologies) and anti-mouse DyLight™ 800 conjugate (1:10000, LifeTechnologies) on a LI-COR imaging device (BioSciences).

### Immunofluorescence microscopy

Cells were fixed by adding formaldehyde to a final concentration of 3.7% in PBS, then permeabilized and blocked in PBS/0.1% TritonX-100/4%(w/v)BSA. Incubation was performed at 4°C overnight with primary antibodies at the following concentrations: goat anti-Brachyury 1  $\mu\text{g ml}^{-1}$  (AF2085, R&D), rabbit anti-Sox2 5  $\mu\text{g ml}^{-1}$  (ab5603, Millipore), rabbit anti- $\beta$ -III-tubulin 1  $\mu\text{g ml}^{-1}$  (T2200, Sigma aldrich), mouse anti-HB9 1.75  $\mu\text{g ml}^{-1}$  (81.5C10, Developmental Studies Hybridoma Bank), rabbit anti-Islet1 2.5  $\mu\text{g ml}^{-1}$  (ab20670, Abcam). Fluorochrome-conjugated secondary antibodies used were the following: anti-goat Alexa647-conjugated 4  $\mu\text{g ml}^{-1}$  (A21447, Invitrogen), anti-rabbit Alexa488-conjugated 4  $\mu\text{g ml}^{-1}$  (A21206, MolecularProbes), anti-mouse Alexa594-conjugated 4  $\mu\text{g ml}^{-1}$  (A11032, MolecularProbes). Observations were carried out with a DeltaVision fluorescence microscope (GE Healthcare), and images were acquired using the softWoRx software, except images in Figure S8 which were captured on a Zeiss LSM 710 confocal microscope.

### Flow cytometry analysis of protein expression profile

Cells were harvested using TryLEselect, fixed for 10 min in 4% paraformaldehyde and re-suspended as single cells in PBS 1%BSA. An additional 10 min methanol fixation step was added for Sox2 and Brachyury detection. Primary antibodies were incubated for 1 h at room temperature in PBS 4% BSA, cells were then washed and incubation with secondary antibodies

performed for 30 min at room temperature. Antibody used are the followings: goat anti-Brachyury 1  $\mu\text{g}/\text{mL}$  (AF2085, R&D), rabbit anti-Sox2 5  $\mu\text{g}/\text{mL}$  (ab5603, Millipore), anti-goat Alexa647-conjugated 2  $\mu\text{g}/\text{mL}$  (A21447, Invitrogen), anti-rabbit Alexa488-conjugated 2  $\mu\text{g}/\text{mL}$  (A21206, MolecularProbes). After washes, fluorescence was measured on a FACSCanto cytometer (BD Bioscience) and results analyzed using FlowJo software. Quadrant gates used to estimate the percentage of positive cells were designed based on fluorescence levels detected in the control samples processed without primary antibodies.

### **GFP-Nkx1.2 engineering**

#### **GFP-Nkx1.2 engineering**

The donor plasmid construct, pDonorNkx1.2NterKI, was synthesized by GeneArt. The vector is based on a pMK-RQ backbone and contains a Kanamycin resistance cassette and the GFP-T2A insert flanked by 500 bp homology arms for recombination to the Nkx1.2 5' end. The second plasmid used, px335Nkx1.2NterKlas, encoded the Cas9D10A nickase (Cong et al., 2013) and the antisense gRNA (asgRNA GCCCACGGGCCGCGGTCGG). A third plasmid, pBABEDpU6Nkx1.2NterKIs, included the sense gRNA (sgRNA GCTGGCATGGCAGGACGGCG) and a puromycin resistance cassette to select transfected cells. CRISPR-Cas9 mediated gene targeting was performed as follows; H9 hESC were dispersed to single cells using TryLE select (Life Technologies) and re-suspended in DEF medium in the presence of Y-27632 (10mM, Tocris). For transfection,  $5 \times 10^6$  cells were pelleted by centrifugation at 300 xg for 3 minutes, washed with PBS and re-suspended in 100 $\mu\text{L}$  buffer R (Neon Transfection Kit, Life Technologies) containing 4 $\mu\text{g}$  of pDonorNkx1.2NterKI, 2 $\mu\text{g}$  of px335Nkx1.2NterKlas and 2 $\mu\text{g}$  of pBABEDpU6Nkx1.2NterKIs. Electroporation was performed with the Neon Transfection System (Life Technologies) using the following parameters: 1 pulse, 1150V, 30ms. Transfected cells were plated and allowed to recover for 36 hours, puromycin selection (1  $\mu\text{g ml}^{-1}$ ) was applied for a further 36 hours. Clones were left to grow until easily visible, hand-picked and seeded back in 96 well plates before being amplified. Screening of the clones for GFP integration was performed by PCR using primers amplifying across the insertion sites (GFPcheckFw1+GFPcheckRev1, see the table below for sequences) (Fig. 2G). Correctly targeted integration of the GFP-T2A sequence was checked in 40 transformed hESC clones by PCR across the integration site. Overlapping PCR amplification products spanning the locus from outside the homologous region to inside the GFP sequence on both sides of the integration were sequenced (GFPcheckFw1+GFPcheckRev2 and GFPcheckFw2+GFPcheckRev1, see the table below for sequences). Five clones were found to include the GFP-T2A sequence at the correct



locus and these were all heterozygous for GFP-Nkx1.2 (Figure 2G). PCR bands obtained for GFP-Nkx1.2 clone 5 were sequenced to check for integrity of the recombination borders and absence of mutations. Results were combined and detailed sequence of the engineered allele was obtained (Figure S4).

| primer       | sequence                |
|--------------|-------------------------|
| GFPcheckFw1  | CAGTTGCATCCCCAAGTCTAAGG |
| GFPcheckFw2  | AGTGAAGCAAAAGACTGAGAGTC |
| GFPcheckRev1 | TTTCTGTGGGTCCAGGATGTCCA |
| GFPcheckRev2 | GTTGAGTCTGGGGAGCTTGAGC  |

### Whole Genome Sequencing

gDNA was extracted from GFP-Nkx1.2 hES cells using the DNeasy Blood and Tissue Kit (Qiagen), according to the manufacturer's instruction. Whole Genome Sequencing was performed by Novogene and deposited in ENA accession number XXXX). Briefly, a library was generated from 1 µg gDNA using Truseq Nano DNA HT sample preparation Kit (Illumina) following manufacturer's recommendations and sequenced on an Illumina platform. After quality control, BWA (version 0.7.8 - r455) was used to align reads to the genome, using the 1000Genomes (GRCh37+decoy) human as reference. BAM files were sorted using SAMtools (version 1.0) and read duplicates identified using Picard (version 1.111). Structural variation (SV) analysis was done using Delly (v0.7.2) (Rausch et al. 2012), and ANNOVAR (version 2015Mar22) was used to annotate the SV. An average coverage of 33X was obtained (depth >20X for 92% of bases).

### Cell purification for RNA-Seq analysis by FACS

Cells were sorted on a BD Influx (Becton Dickinson) cell sorter using the 100 µm nozzle. FSC vs SSC was used to identify live cells and then FSC-A vs FSC-W to identify single cells. The GFP positive cells were identified using 488 nm laser light and the parameters GFP (530/40) and PE (580/30). The gate to identify GFP positive cells was set using a GFP negative control (H9 cells differentiated in parallel) and events that fell into this gate were sorted to more than 97% purity. 1.5 million GFP positive cells sorted at day 3 were used per sample for RNA extraction.

### Library preparation for RNA-Seq and Sequencing

Total RNA was extracted using the RNEasy mini kit (Qiagen), following the manufacturer's instructions, with the addition of a DNase digestion step performed on the column for 15 min with RQ1-DNase (Promega). RNA concentration was measured on a Qubit device using Qubit RNA BR assay kit (ThermoFisher), and quality was checked on a TapeStation instrument (Agilent). Individually labeled libraries were prepared from 1 µg of RNA per sample using the TruSeq® Stranded mRNA Library prep kit (Illumina), according to manufacturer's instructions. 2 µL of Spike-ins (1/100 dilution ERCC Spike-in controls Mix1) was added per sample. Libraries were pooled and sequencing was performed on a NextSeq (Illumina) at the Tayside Center for Genomic analysis (Ninewells, Dundee) as follows: high output run, 2x75bp paired end sequencing, between 35 and 46 million uniquely mapped reads obtained per sample (12 samples multiplexed). RNA-seq data are available in the ArrayExpress database (<http://www.ebi.ac.uk/arrayexpress>) under accession number E-MTAB-6680.

### RNA-Seq analysis

RNA-Seq reads were mapped to the reference genome (version GRCh38, release 87) using STAR 2.5.2b, using stranded option. Typically, about 92% of reads were mapped uniquely (except for D3(NMP-like) replicate 4, where uniquely mapped reads were at 86.8%). Read counts per gene were found in the same STAR run. Data from (Chu et al. 2016) were re-analysed in the same fashion, however, we point out that these were single-end non-stranded reads. For the following analysis, 4 biological replicates were used for D3(NMP-like) and 2 for D8 samples. Differential expression was performed with edgeR 3.16.5, for each pair of conditions independently. Benjamini-Hochberg multiple-test correction was applied to test p-values. Human NMP-like genes (Fig. 3A) were determined by selecting genes using the following criteria: at least 10 read counts in D3(NMP-like), significantly enriched (p value < 0.01) in D3(NMP-like) compared to both hESC and hD8 samples, with a foldchange >2. Time-dependent properties of genes were studied using intensity profiles hESC-D3(NMP-like)-D8. Each point in the profile is a DESeq-normalized mean gene count across replicates. To make profiles comparable, they were normalized to their mean across conditions, so the mean of each normalized profile is 1.

Comparisons between this human NMP-like signature and mouse NMP genes identified elsewhere was performed based on gene names. Gene list in figure 3C was obtained by comparing human NMP-like gene list (this study, full list in table S1) and bulk-RNA-Seq of mESC-derived NMPs (table S1 from Gouti et al., 2014). Gene lists in figure 3D were obtained by comparing human NMP-like gene list (this study, full list in table S1) and extended single cell RNA-Seq data obtained for NMP from e8.5 and e9.5 embryos (Gouti et al., 2017).

### Calcium imaging

To visualize  $\text{Ca}^{2+}$  levels, D3 NMP-like cells or D8 NPs (200K cells/cm<sup>2</sup>) were differentiated as described in Figure 1B and incubated in a mixture of Fluo3, AM (Invitrogen; stock 1 mM in DMSO, delivered to cells 1 $\mu$ M) at 37°C for 30 min, rinsed with Neurobasal medium (Gibco) supplemented as appropriate for D3 or D8 and left to recover for 1h. Fluo3,AM was then excited at 488 nm and the fluorescence generated was imaged by Deltavision Core microscope system in a WeatherStation environmental chamber maintained at 37°C. The D3 NMP-like and D8 NP medium was buffered with a 5% CO<sub>2</sub>/95% air mix and maintained in a humid chamber. Images were acquired using an Olympus 20x 1.30 NA objective using a Xenon light source and a CoolSnap HQ2 cooled CCD camera (Photometrics). Images were deconvolved and maximum intensity projections of Z-stacks were made using SoftWorx imaging software (Applied Precision). To provide a positive control for response to calcium influx, D3 NMP-like and D8 NP cells were incubated with A23187 (Sigma C7522) 10  $\mu$ g/ml in 0.1% DMSO in Neurobasal) at 37°C for 20 min, rinsed, incubated in with Fluo3, AM for 30 min and then rinsed in Neurobasal medium. The fluorescence generated was imaged as above. The raw data were then quantified using Image J plugin Heatmap Histogram. Data and statistical analyses are presented in Figure S7 and legend.

### Acknowledgements

We thank members of the Storey Laboratory and Professor Carol Mackintosh for critical reading of this manuscript. This research was supported by a Wellcome Trust Investigator Award to KGS (WT102817AIA).

## References

- Albano RM, Arkell R, Beddington RS, Smith JC. 1994. Expression of inhibin subunits and follistatin during postimplantation mouse development: decidual expression of activin and expression of follistatin in primitive streak, somites and hindbrain. *Development* 120: 803-813.
- Amoroso MW, Croft GF, Williams DJ, O'Keeffe S, Carrasco MA, Davis AR, Roybon L, Oakley DH, Maniatis T, Henderson CE et al. 2013. Accelerated high-yield generation of limb-innervating motor neurons from human stem cells. *The Journal of neuroscience : the official journal of the Society for Neuroscience* 33: 574-586.
- Andang M, Hjerling-Leffler J, Moliner A, Lundgren TK, Castelo-Branco G, Nanou E, Pozas E, Bryja V, Halliez S, Nishimaru H et al. 2008. Histone H2AX-dependent GABA(A) receptor regulation of stem cell proliferation. *Nature* 451: 460-464.
- Ang S-L, Jin O, Rhinn M, Daigle N, Stevenson L, Rossant J. 1996. A targeted mouse Otx-2 mutation leads to severe defects in gastrulation and formation of axial mesoderm and to deletion of rostral brain. *Development* 122: 243-252.
- Aulehla A, Wehrle C, Brand-Saberi B, Kemler R, Gossler A, Kanzler B, Herrmann BG. 2003. Wnt3a plays a major role in the segmentation clock controlling somitogenesis. *Developmental cell* 4: 395-406.
- Bel-Vialar S, Medevielle F, Pituello F. 2007. The on/off of Pax6 controls the tempo of neuronal differentiation in the developing spinal cord. *Developmental biology* 305: 659-673.
- Beverdam A, Meijlink F. 2001. Expression patterns of group-I aristaless-related genes during craniofacial and limb development. *Mechanisms of development* 107: 163-167.
- Bulusu V, Prior N, Snaebjornsson MT, Kuehne A, Sonnen KF, Kress J, Stein F, Schultz C, Sauer U, Aulehla A. 2017. Spatiotemporal Analysis of a Glycolytic Activity Gradient Linked to Mouse Embryo Mesoderm Development. *Developmental cell* 40: 331-341 e334.
- Chambers SM, Fasano CA, Papapetrou EP, Tomishima M, Sadelain M, Studer L. 2009. Highly efficient neural conversion of human ES and iPS cells by dual inhibition of SMAD signaling. *Nature biotechnology* 27: 275-280.
- Chapman SC, Schubert FR, Schoenwolf GC, Lumsden A. 2002. Analysis of spatial and temporal gene expression patterns in blastula and gastrula stage chick embryos. *Developmental biology* 245: 187-199.
- Cheng Y, Lotan R. 1998. Molecular cloning and characterization of a novel retinoic acid-inducible gene that encodes a putative G protein-coupled receptor. *The Journal of biological chemistry* 273: 35008-35015.
- Chu LF, Leng N, Zhang J, Hou Z, Mamott D, Vereide DT, Choi J, Kendzioriski C, Stewart R, Thomson JA. 2016. Single-cell RNA-seq reveals novel regulators of human embryonic stem cell differentiation to definitive endoderm. *Genome Biol* 17: 173.
- Cunningham TJ, Brade T, Sandell LL, Lewandoski M, Trainor PA, Colas A, Mercola M, Duester G. 2015. Retinoic Acid Activity in Undifferentiated Neural Progenitors Is Sufficient to Fulfill Its Role in Restricting Fgf8 Expression for Somitogenesis. *PloS one* 10: e0137894.
- Delfino-Machin M, Lunn JS, Breitkreuz DN, Akai J, Storey KG. 2005. Specification and maintenance of the spinal cord stem zone. *Development* 132: 4273-4283.
- Denham M, Hasegawa K, Menhenniott T, Rollo B, Zhang D, Hough S, Alshawaf A, Febbraro F, Ighaniyan S, Leung J et al. 2015. Multipotent caudal neural progenitors derived from human pluripotent stem cells that give rise to lineages of the central and peripheral nervous system. *Stem cells* 33: 1759-1770.
- Diez del Corral R, Olivera-Martinez I, Goriely A, Gale E, Maden M, Storey K. 2003. Opposing FGF and retinoid pathways control ventral neural pattern, neuronal differentiation, and segmentation during body axis extension. *Neuron* 40: 65-79.
- Gouti M, Delile J, Stamatakis D, Wymeersch FJ, Huang Y, Kleinjung J, Wilson V, Briscoe J. 2017. A Gene Regulatory Network Balances Neural and Mesoderm Specification during Vertebrate Trunk Development. *Developmental cell* 41: 243-261 e247.

- Gouti M, Metzis V, Briscoe J. 2015. The route to spinal cord cell types: a tale of signals and switches. *Trends in genetics : TIG* 31: 282-289.
- Gouti M, Tsakiridis A, Wymeersch FJ, Huang Y, Kleinjung J, Wilson V, Briscoe J. 2014. In vitro generation of neuromesodermal progenitors reveals distinct roles for wnt signalling in the specification of spinal cord and paraxial mesoderm identity. *PLoS biology* 12: e1001937.
- Harland R. 2000. Neural induction. *Curr Opin Genet Dev* 10: 357-362.
- Hemmati Brivanlou A, Melton D. 1997. Vertebrate embryonic cells will become nerve cells unless told otherwise. *Cell* 88: 13-17.
- Henrique D, Abranches E, Verrier L, Storey KG. 2015. Neuromesodermal progenitors and the making of the spinal cord. *Development* 142: 2864-2875.
- Huang D, Chen SW, Langston AW, Gudas LJ. 1998. A conserved retinoic acid responsive element in the murine Hoxb-1 gene is required for expression in the developing gut. *Development* 125: 3235-3246.
- Kim JH, Lee SR, Li LH, Park HJ, Park JH, Lee KY, Kim MK, Shin BA, Choi SY. 2011. High cleavage efficiency of a 2A peptide derived from porcine teschovirus-1 in human cell lines, zebrafish and mice. *PloS one* 6: e18556.
- Komor AC, Badran AH, Liu DR. 2017. CRISPR-Based Technologies for the Manipulation of Eukaryotic Genomes. *Cell* 169: 559.
- Kuroda H, Wessely O, De Robertis EM. 2004. Neural induction in *Xenopus*: requirement for ectodermal and endomesodermal signals via Chordin, Noggin, beta-Catenin, and Cerberus. *PLoS biology* 2: E92.
- Liem KF, Jessell TM, Briscoe J. 2000. Regulation of the neural patterning activity of sonic hedgehog by secreted BMP inhibitors expressed by notochord and somites. *Development* 127: 4855-4866.
- Linker C, Stern CD. 2004. Neural induction requires BMP inhibition only as a late step, and involves signals other than FGF and Wnt antagonists. *Development* 131: 5671-5681.
- Lippmann ES, Williams CE, Ruhl DA, Estevez-Silva MC, Chapman ER, Coon JJ, Ashton RS. 2015. Deterministic HOX Patterning in Human Pluripotent Stem Cell-Derived Neuroectoderm. *Stem cell reports* 4: 632-644.
- Liu H, Liu W, Maltby KM, Lan Y, Jiang R. 2006. Identification and developmental expression analysis of a novel homeobox gene closely linked to the mouse Twirler mutation. *Gene expression patterns : GEP* 6: 632-636.
- Maddox DM, Condie BG. 2001. Dynamic expression of a glutamate decarboxylase gene in multiple non-neural tissues during mouse development. *BMC Dev Biol* 1: 1.
- Meinhardt A, Eberle D, Tazaki A, Ranga A, Niesche M, Wilsch-Brauninger M, Stec A, Schackert G, Lutolf M, Tanaka EM. 2014. 3D reconstitution of the patterned neural tube from embryonic stem cells. *Stem cell reports* 3: 987-999.
- Oginuma M, Moncuquet P, Xiong F, Karoly E, Chal J, Guevorkian K, Pourquie O. 2017. A Gradient of Glycolytic Activity Coordinates FGF and Wnt Signaling during Elongation of the Body Axis in Amniote Embryos. *Developmental cell* 40: 342-353 e310.
- Olivera-Martinez I, Harada H, Halley PA, Storey KG. 2012. Loss of FGF-dependent mesoderm identity and rise of endogenous retinoid signalling determine cessation of body axis elongation. *PLoS biology* 10: e1001415.
- Olivera-Martinez I, Storey KG. 2007. Wnt signals provide a timing mechanism for the FGF-retinoid differentiation switch during vertebrate body axis extension. *Development* 134: 2125-2135.
- Padgett CL, Slesinger PA. 2010. GABAB receptor coupling to G-proteins and ion channels. *Adv Pharmacol* 58: 123-147.
- Papanayotou C, De Almeida I, Liao P, Oliveira NM, Lu SQ, Kougioumtzidou E, Zhu L, Shaw A, Sheng G, Streit A et al. 2013. Calfacilitin is a calcium channel modulator essential for initiation of neural plate development. *Nature communications* 4: 1837.
- Rausch T, Zichner T, Schlattl A, Stutz AM, Benes V, Korbel JO. 2012. DELLY: structural variant discovery by integrated paired-end and split-read analysis. *Bioinformatics* 28: i333-i339.

- Ribes V, Stutzmann F, Bianchetti L, Guillemot F, Dolle P, Le Roux I. 2008. Combinatorial signalling controls Neurogenin2 expression at the onset of spinal neurogenesis. *Developmental biology* 321: 470-481.
- Rodrigo-Albors A, Halley PA, Storey KG. 2016. Fate mapping caudal lateral epiblast reveals continuous contribution to neural and mesodermal lineages and the origin of the secondary neural tube. *bioRxiv* 045872.
- Sasai N, Kutejova E, Briscoe J. 2014. Integration of Signals along Orthogonal Axes of the Vertebrate Neural Tube Controls Progenitor Competence and Increases Cell Diversity. *PLoS biology* 12: e1001907.
- Scardigli R, Baumer N, Gruss P, Guillemot F, Le Roux I. 2003. Direct and concentration-dependent regulation of the proneural gene Neurogenin2 by Pax6. *Development* 130: 3269-3281.
- Scardigli R, Schuurmans C, Gradwohl G, Guillemot F. 2001. Crossregulation between Neurogenin2 and pathways specifying neuronal identity in the spinal cord. *Neuron* 31: 203-217.
- Schubert FR, Fainsod A, Gruenbaum Y, Gruss P. 1995. Expression of a novel murine homeobox gene Sax-1 in the developing nervous system. *Mechanisms of development* 51: 99-114.
- Shull GE, Okunade G, Liu LH, Kozel P, Periasamy M, Lorenz JN, Prasad V. 2003. Physiological functions of plasma membrane and intracellular Ca<sup>2+</sup> pumps revealed by analysis of null mutants. *Ann N Y Acad Sci* 986: 453-460.
- Shum AS, Poon LL, Tang WW, Koide T, Chan BW, Leung YC, Shiroishi T, Copp AJ. 1999. Retinoic acid induces down-regulation of Wnt-3a, apoptosis and diversion of tail bud cells to a neural fate in the mouse embryo. *Mechanisms of development* 84: 17-30.
- Sirbu IO, Duester G. 2006. Retinoic-acid signalling in node ectoderm and posterior neural plate directs left-right patterning of somitic mesoderm. *Nature cell biology* 8: 271-277.
- Soldatov NM, Zuhlke RD, Bouron A, Reuter H. 1997. Molecular structures involved in L-type calcium channel inactivation. Role of the carboxyl-terminal region encoded by exons 40-42 in alpha1C subunit in the kinetics and Ca<sup>2+</sup> dependence of inactivation. *The Journal of biological chemistry* 272: 3560-3566.
- Spann P, Ginsburg M, Rangini Z, Fainsod A, Eyal Giladi H, Gruenbaum Y. 1994. The spatial and temporal dynamics of Sax1 (CHox3) homeobox gene expression in the chick's spinal cord. *Development* 120: 1817-1828.
- Takemoto T, Uchikawa M, Kamachi Y, Kondoh H. 2006. Convergence of Wnt and FGF signals in the genesis of posterior neural plate through activation of the Sox2 enhancer N-1. *Development* 133: 297-306.
- Tsakiridis A, Huang Y, Blin G, Skylaki S, Wymeersch F, Osorno R, Economou C, Karagianni E, Zhao S, Lowell S et al. 2014. Distinct Wnt-driven primitive streak-like populations reflect in vivo lineage precursors. *Development* 141: 1209-1221.
- Tsakiridis A, Wilson V. 2015. Assessing the bipotency of in vitro-derived neuromesodermal progenitors. *F1000Research* 4: 100.
- Tsien RY. 1981. A non-disruptive technique for loading calcium buffers and indicators into cells. *Nature* 290: 527-528.
- Turner DA, Hayward PC, Baillie-Johnson P, Rue P, Broome R, Faunes F, Martinez Arias A. 2014. Wnt/beta-catenin and FGF signalling direct the specification and maintenance of a neuromesodermal axial progenitor in ensembles of mouse embryonic stem cells. *Development* 141: 4243-4253.
- Tzouanacou E, Wegener A, Wymeersch FJ, Wilson V, Nicolas JF. 2009. Redefining the progression of lineage segregations during mammalian embryogenesis by clonal analysis. *Developmental cell* 17: 365-376.
- Wilson PA, Hemmati-Brivanlou A. 1995. Induction of epidermis and inhibition of neural fate by Bmp-4. *Nature* 376: 331-333.
- Wilson V, Olivera-Martinez I, Storey KG. 2009. Stem cells, signals and vertebrate body axis extension. *Development* 136: 1591-1604.
- Yamamoto A, Nagano T, Takehara S, Hibi M, Aizawa S. 2005. Shisa promotes head formation through the inhibition of receptor protein maturation for the caudalizing factors, Wnt and FGF. *Cell* 120: 223-235.

- Young T, Deschamps J. 2009. Hox, Cdx, and anteroposterior patterning in the mouse embryo. *Curr Top Dev Biol* 88: 235-255.
- Young T, Rowland JE, van de Ven C, Bialecka M, Novoa A, Carapuco M, van Nes J, de Graaff W, Duluc I, Freund JN et al. 2009. Cdx and Hox genes differentially regulate posterior axial growth in mammalian embryos. *Developmental cell* 17: 516-526.
- Yu BD, Hanson RD, Hess JL, Horning SE, Korsmeyer SJ. 1998. MLL, a mammalian trithorax-group gene, functions as a transcriptional maintenance factor in morphogenesis. *Proceedings of the National Academy of Sciences of the United States of America* 95: 10632-10636.

Figures

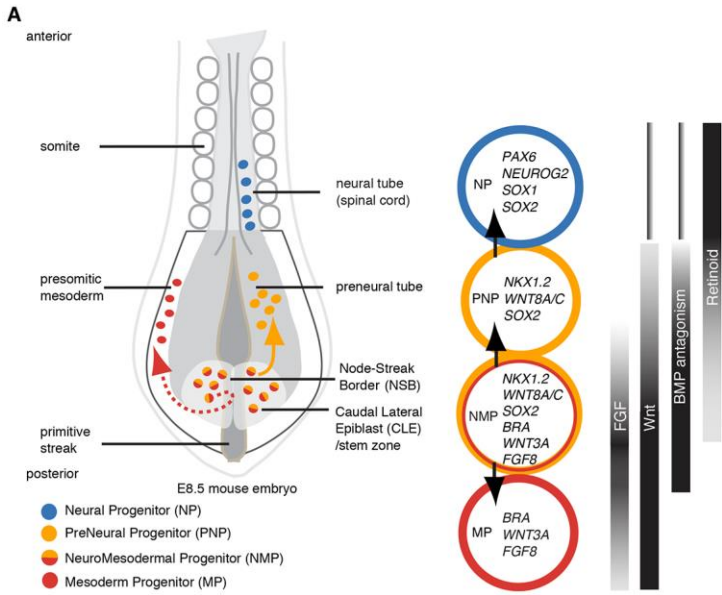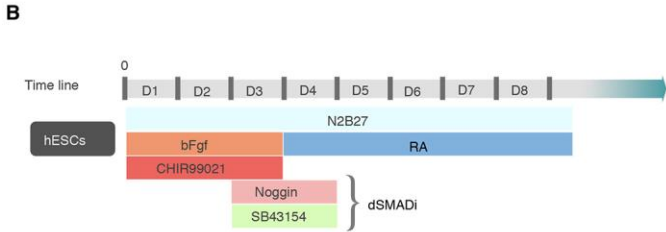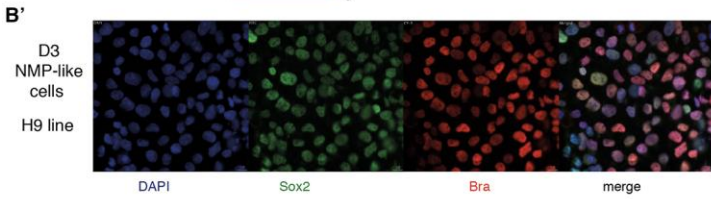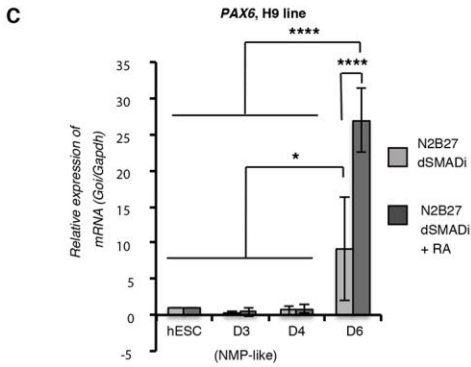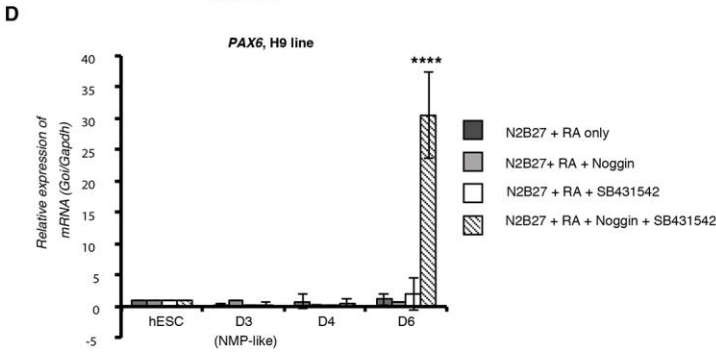



### Figure 1 Protocol for neural differentiation of human NMP-like cells

A. Schematic of mouse E8.5 caudal embryo. Selected progenitor cell marker genes and signalling pathways operating during posterior neural differentiation. B. Schematic of the developed differentiation protocol, including a dual-SMAD inhibition step (dSMADi-RA), and immunocytochemistry for Bra and Sox2 in day 3 NMPs (3 independent experiments). C. RTqPCR showing *Pax6* in H9-line differentiated as in B, +/-100 nM RA from day 3. D. RTqPCR for *Pax6* in cells differentiated as in B, with varying SMAD inhibitor inclusion day 2-4. RTqPCR graphs represent expression normalized to *Gapdh* and relative to hESC levels (3 independent experiments, error bars are SEMs, and significant differences, \*\*\*\*pvalue <0.0001, \*\*\*pvalue<0.001, \*\*pvalue<0.01, \*pvalue<0.05 (ANOVA test), here and for all subsequent RTqPCR data.

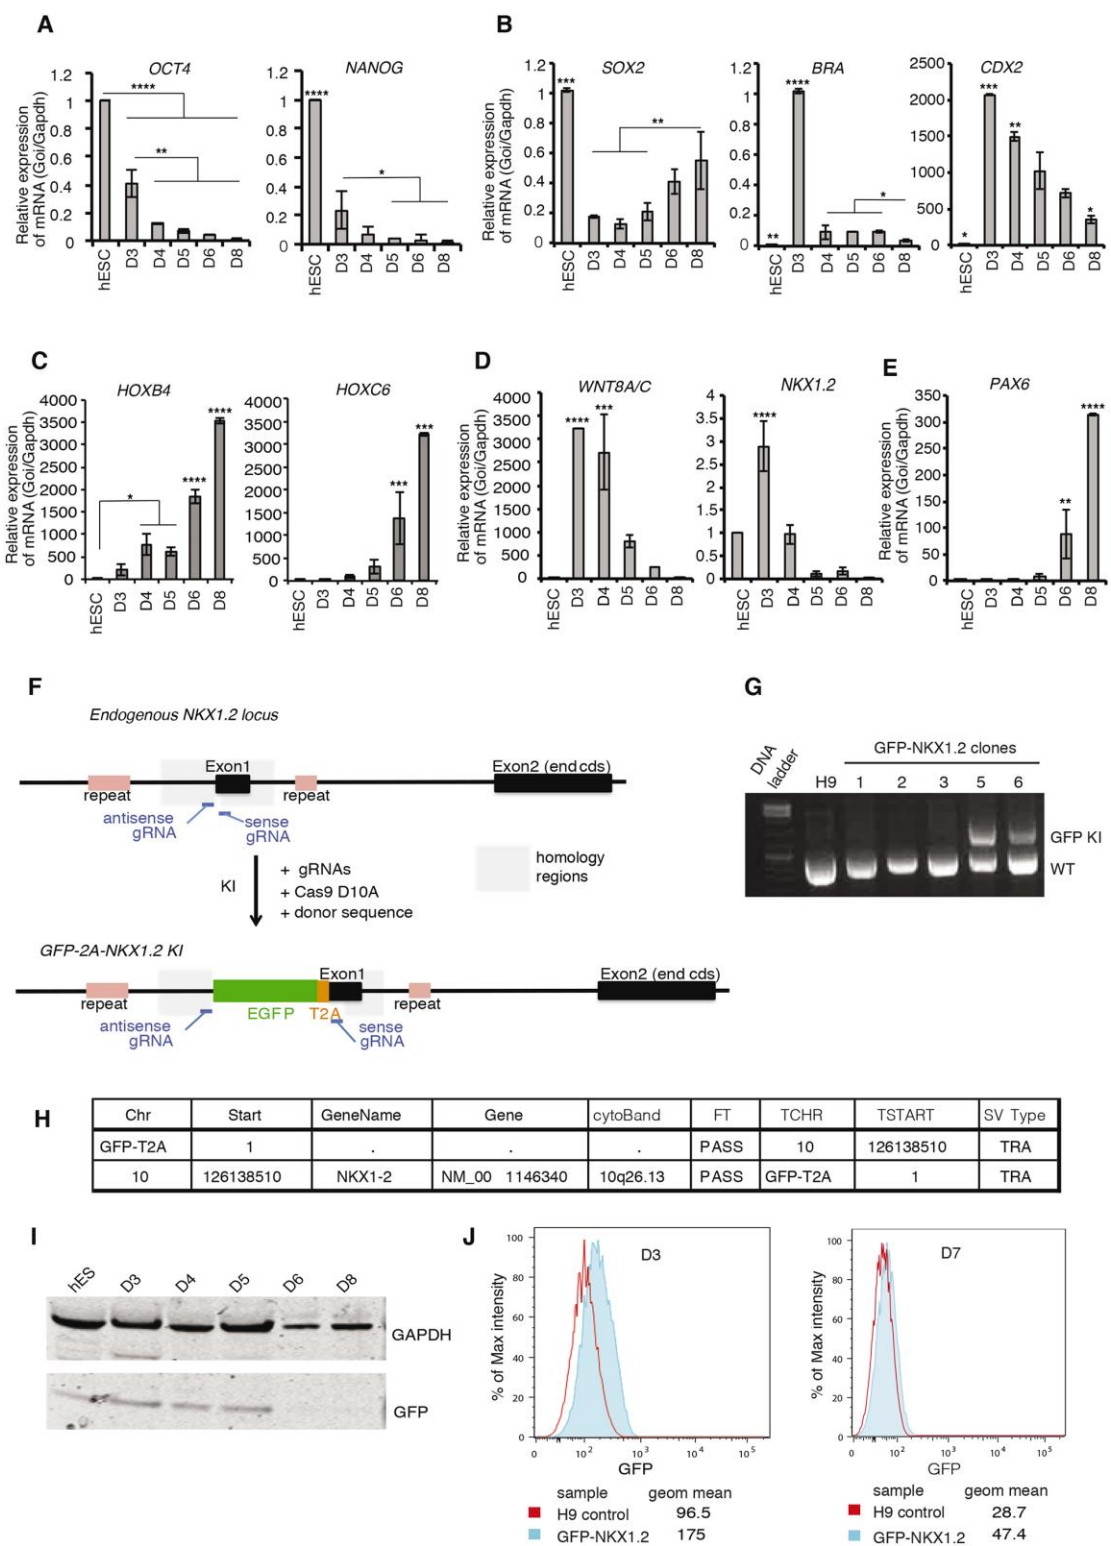

**Figure 2 RTqPCR for selected genes during dSMADi-RA differentiation and generation of a GFP-Nkx1.2 reporter line**

A-E. RTqPCR assessing relative expression of key marker genes in H9-cells exposed to dSMADi-RA protocol (Fig. 1F). A. Declining expression of pluripotency genes *Oct4* and *Nanog*. B. *Sox2*, *Bra* and *Cdx2* expression dynamics. C. *HoxB4* and *HoxC6* during differentiation. D. Expression neural progenitor marker *Pax6*. E. *Wnt8a/c* and *Nkx1.2*, characteristic of preneural progenitors and NMPs. F. Experimental strategy schematic: H9 hESC were engineered using CRISPR/Cas9, knocking-in the GFP-T2A sequence upstream exon 1 of *Nkx1.2*. Positions of the gRNAs, and homologous regions used in the repair template are indicated. G. PCR amplification of the *Nkx1.2* locus using primers framing the insertion site. H9: untransfected control, 1-3: GFP negative clones, 5 and 6: clones containing the GFP insertion (GFP KI = knockin, WT = wildtype allele). H. Whole genome sequencing of GFP-Nkx1.2 clone 5. Structural variation analysis relative to GFP-T2A sequence: FT: per sample genotype filter; TCHR: chromosome for the translocation breakpoint coordinate; TSTART: translocation breakpoint coordinate; SVType: structural variation type; TRA: translocation. I. Western blot of GFP during differentiation of the GFP-Nkx1.2 line. J. Flow cytometry of GFP expression day 3 and day 7: % of maximum-intensity for GFP-channel is plotted, representative values of at least 2 experiments.

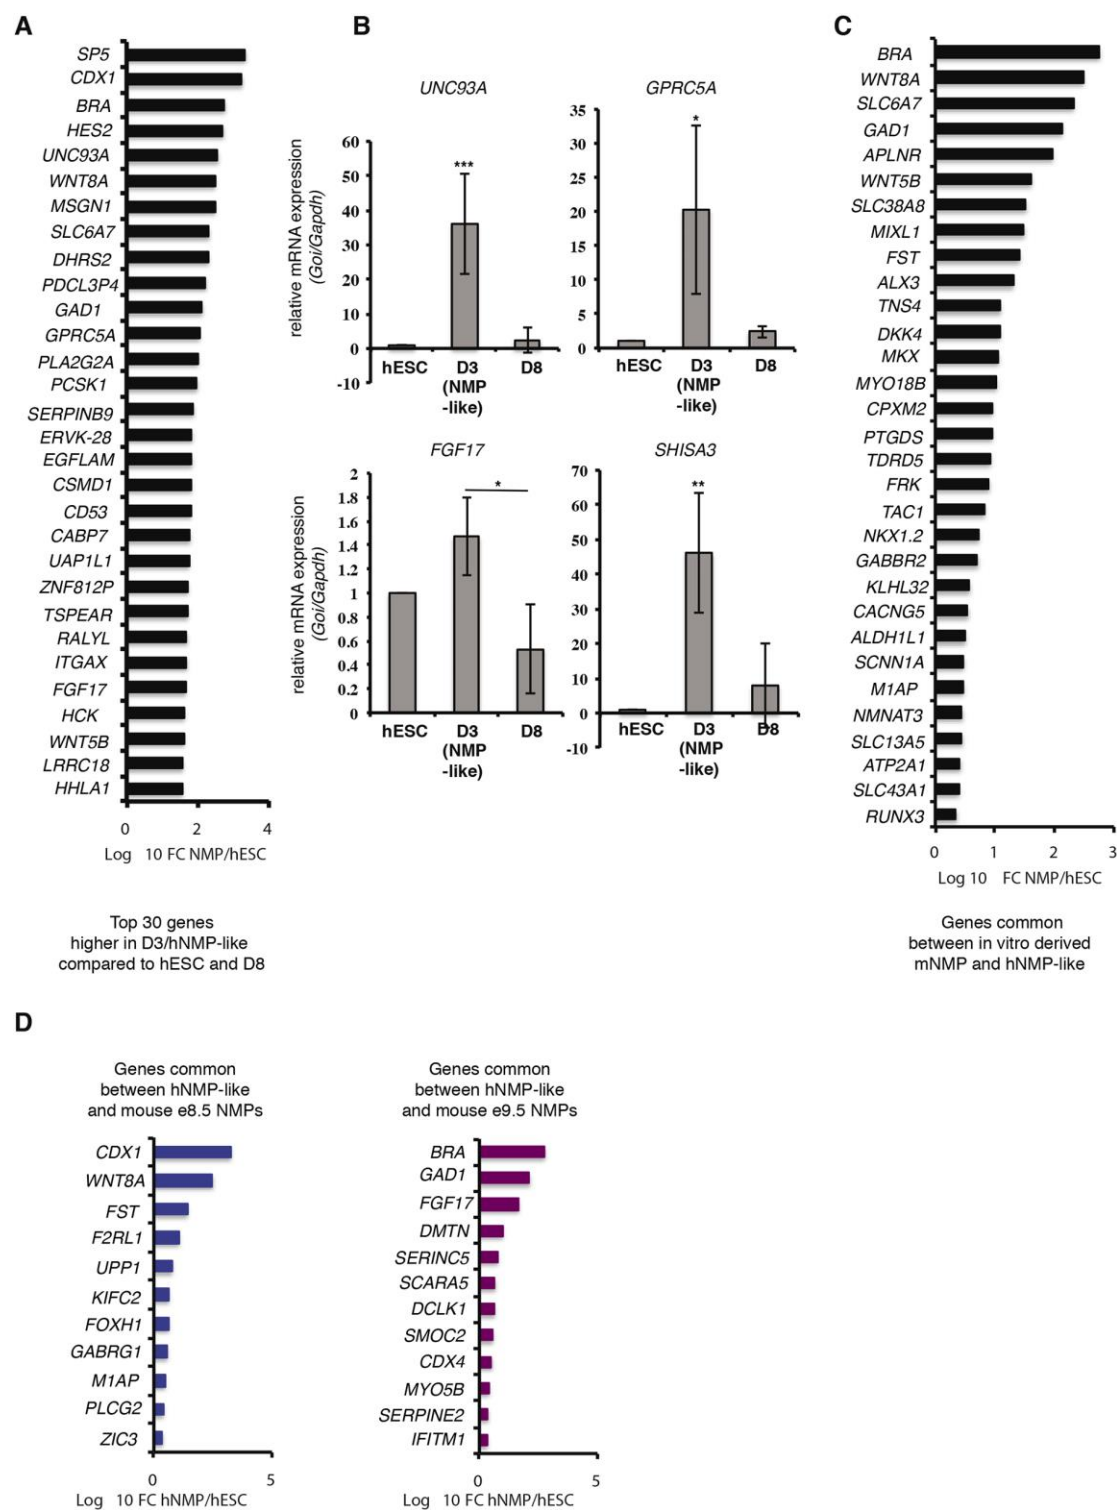

### Figure 3 Characterization and conservation of Human D3(NMP-like cell) transcriptome

A. Genes preferentially expressed in human D3(NMP-like cells) compared to hESC and hD8 neural progenitors (NP). Genes were considered preferentially expressed in hD3 when >2-fold-change between hD3 and both hESC and hD8 (TableS1). B. RTqPCR for subset of D3-enriched genes. C. Comparison of human NMP-like-enriched genes (this study) and bulk-RNA-Seq of mESC-derived NMPs (Gouti et al., 2014). D. Comparison of NMP-like-enriched genes in human (this study) with mouse embryo eNMP transcriptional signatures obtained by comparing scRNA-Seq data for e8.5 and e9.5 embryos (Gouti et al., 2017).

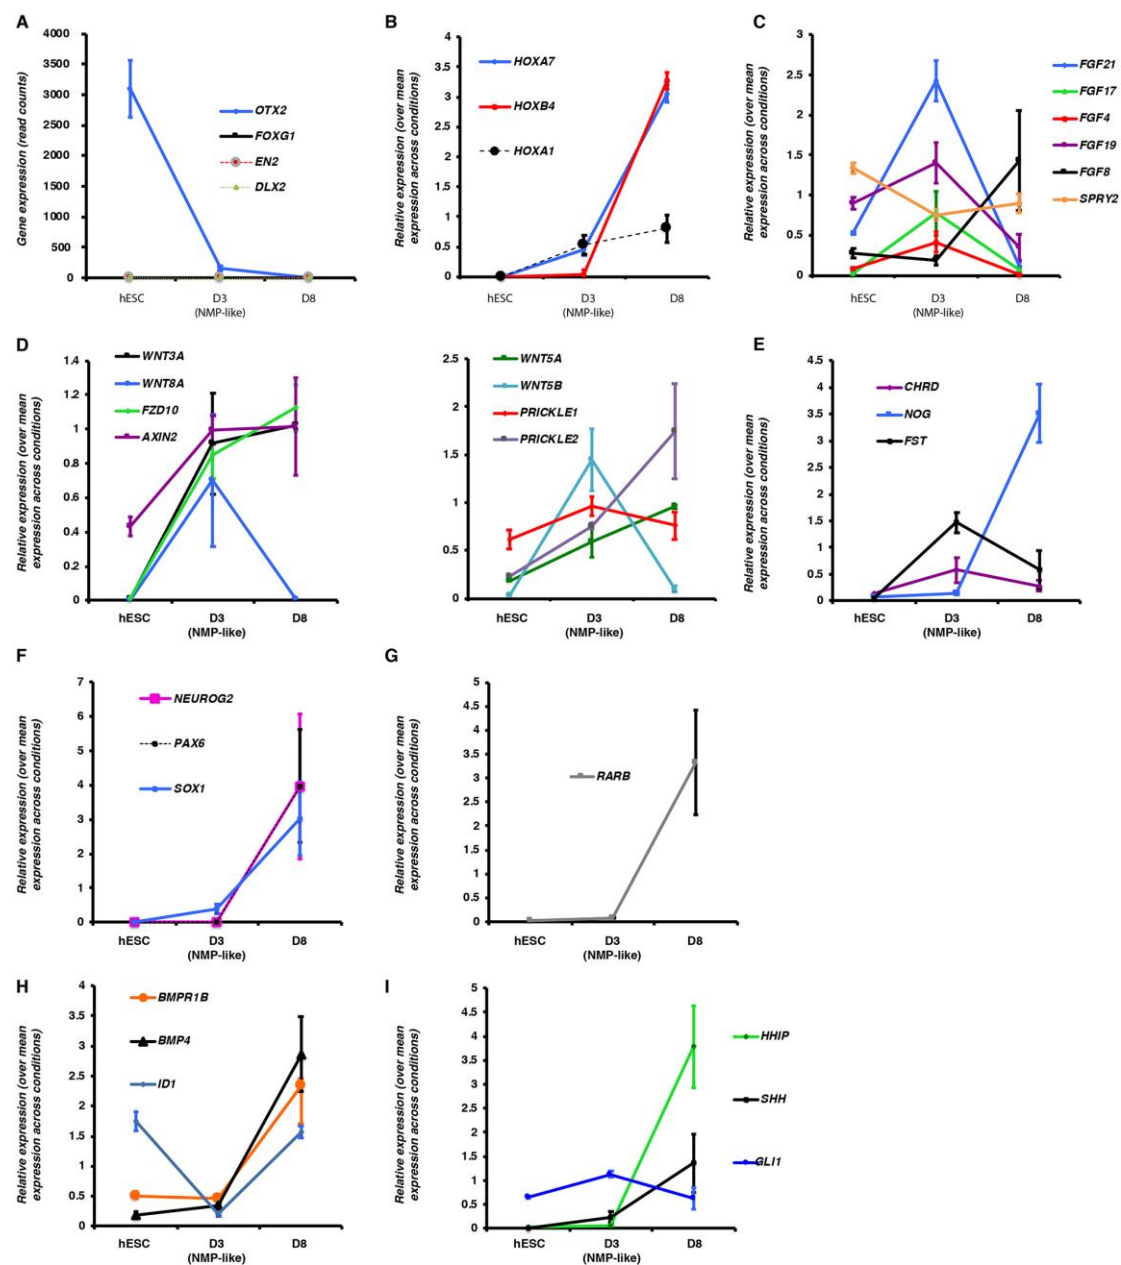

**J**

|                                      | gene name | Fold change D8/D3(NMP-like) | average read counts D3 | average read counts D8 |
|--------------------------------------|-----------|-----------------------------|------------------------|------------------------|
| Dorsal domain and neural crest genes | PAX7      | 110                         | 5                      | 551                    |
|                                      | PAX3      | 531                         | 7                      | 3715                   |
|                                      | SOX10     | 20                          | 34                     | 689                    |
|                                      | SNAIL2    | 8                           | 122                    | 1018                   |
|                                      | ZEB2      | 3                           | 1370                   | 4138                   |
|                                      | WNT1      | 150                         | 1                      | 150                    |
| Ventral domain                       | WNT4      | 5                           | 28                     | 139                    |
|                                      | NCX6.1    | 82                          | 5                      | 417                    |
|                                      | IRX3      | 45                          | 27                     | 1226                   |
|                                      | OLIG2     | 29                          | 11                     | 310                    |

**Figure 4 Expression of selected genes across 3 conditions analysed by RNA-Seq.**

A. Anterior neural marker genes, presented as read counts. B. Main *Hox* genes expressed at D3 and D8. Selected components of C. FGF, and D. Wnt signaling pathways. E. Selected BMP/TGF $\beta$  inhibitors. F. Neural progenitor and neurogenic genes, and G. Retinoid receptor *RAR $\beta$*  during hNMP-like cell differentiation. Selected components of H. BMP, and I. Shh signalling pathways. B-I relative expression of each gene normalized to its mean expression across all conditions SEMs for each gene are shown. J. Table of neural crest, dorsal and ventral progenitor genes induced during dSMADi-RA differentiation. Fold change between D8 and D3(NMP-like) time points, mean read counts for D3(NMP-like) and D8 are shown.

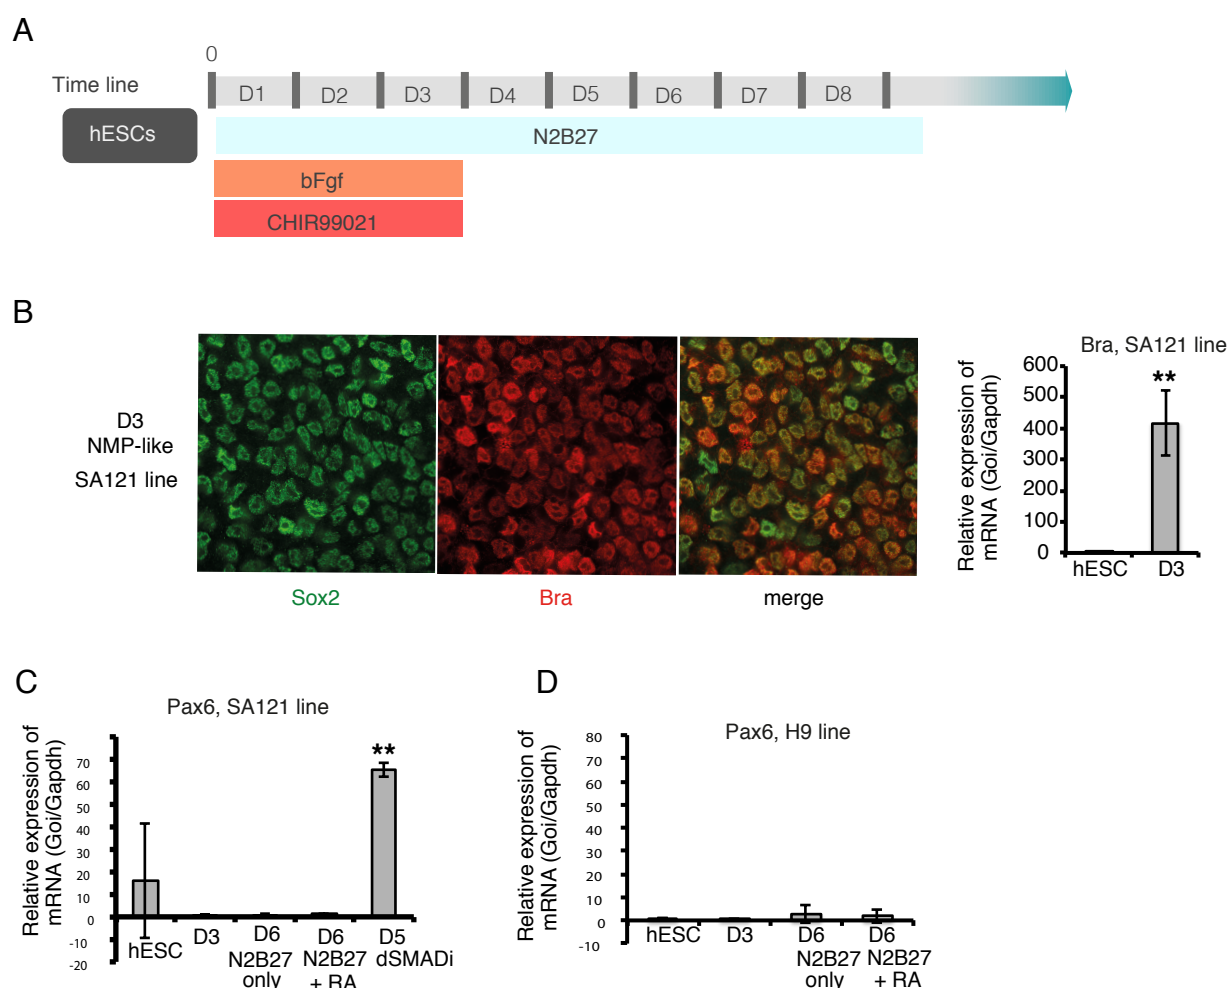

**Figure S1** Assessment of neural differentiation of hNMP-like cells in basic differentiation conditions

A. Basic protocol for in vitro generation and neural differentiation of hNMP-like cells as in (Gouti et al., 2014) and B. co-expression of Bra/Sox2 proteins on day 3 of protocol shown in A, detected by immunocytochemistry (3 independent experiments) and RTqPCR assessing relative expression of Bra during generation of NMP-like cells (SA121 line). C. RTqPCR for Pax6 in SA121 cell line cultured as indicated (SA121-line exhibits low-level Pax6 in hESC, while H9-line does not and so H9 was used for all subsequent experiments). D. RTqPCR for Pax6 in H9 cells cultured as indicated. This basic protocol did not elicit Pax6 expressing cells in either SA121 or H9 lines. This contrasted with the positive control for Pax6 transcription provided by a protocol for inducing anterior neural progenitors, exposure to Noggin 50 ng/ml and the TGF receptor type 1 inhibitor SB431542 10 M following removal of self-renewal conditions (dual SMAD inhibition, (Chambers et al. 2009), shown in C. RTqPCR graphs represent expression normalized to *Gapdh* and relative to hESC levels and all constitute 3 independent experiments, error bars are SEMs. Significant differences are represented here and for all subsequent RTqPCR data: \*\*\*\*p value <0.0001, \*\*\*p value <0.001, \*\*p value <0.01, \*pvalue <0.05 (ANOVA test, except for figure S1B:T-test).



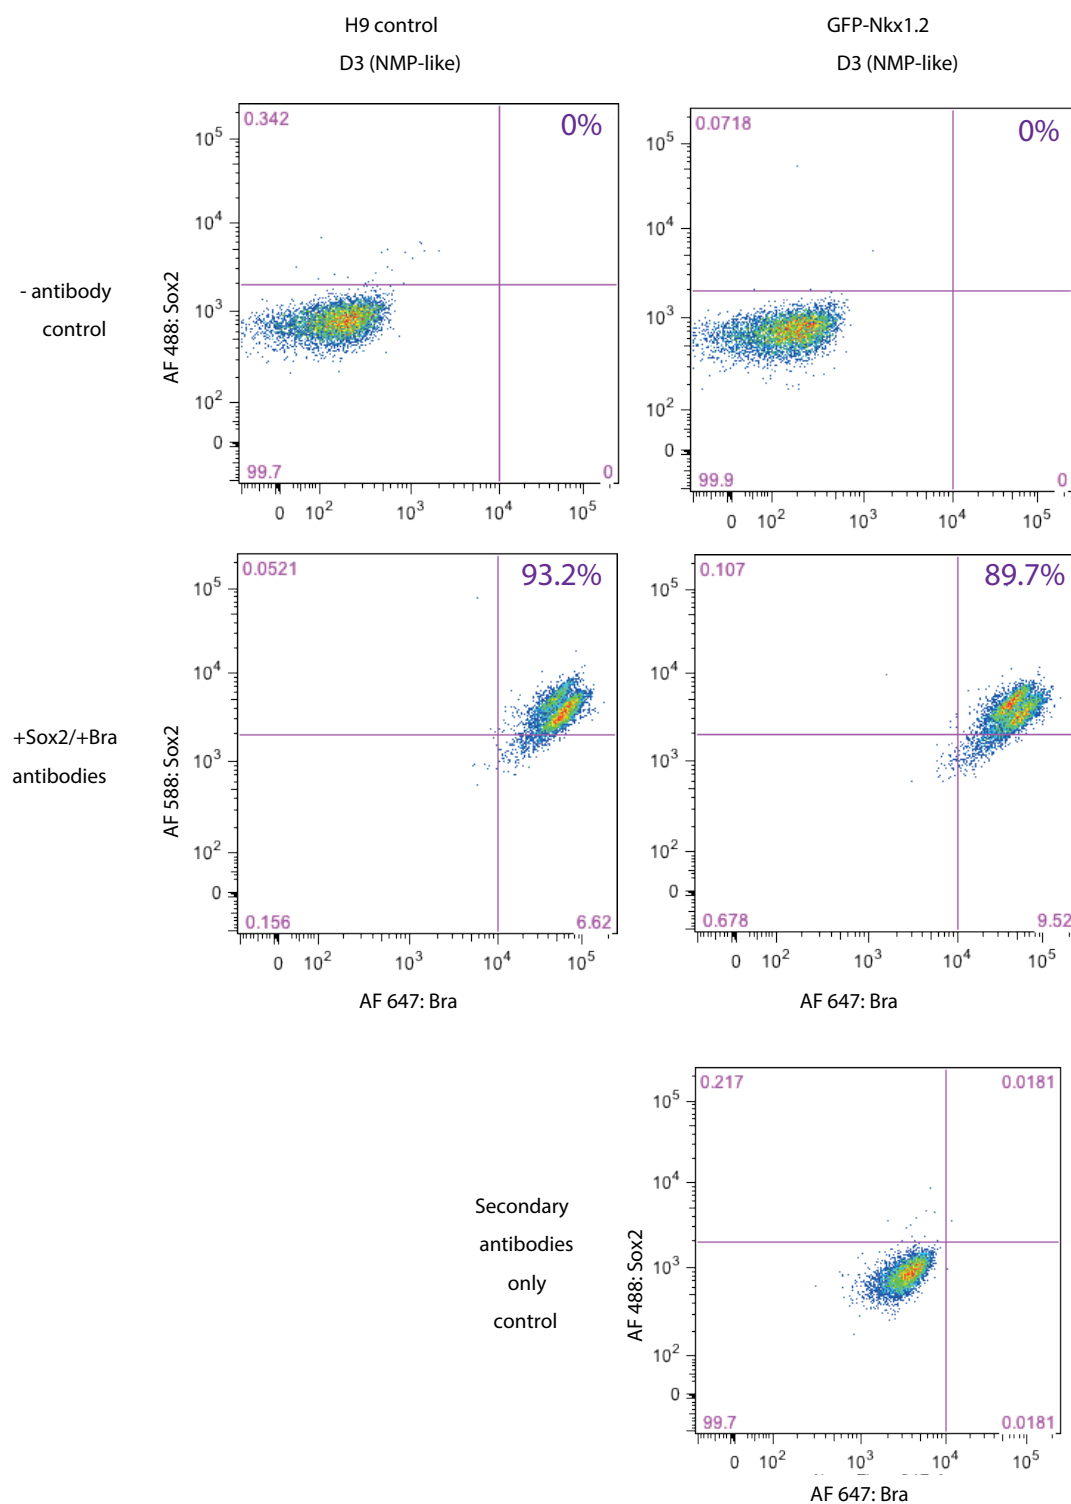

**Figure S2 Co-expression of Sox2 and Bra proteins in hD3(NMP-like) cells**

Expression of Sox2 and Bra was analyzed by flow cytometry in D3 cells derived from H9 cell line (left panels) and H9-GFP-Nkx1.2 cell line (right panels). Upper panels: no antibodies control, middle panels: staining with anti-Sox2 and anti-Bra antibodies, bottom graph: secondary antibodies alone (control). The quadrant for quantification of co-expression levels was defined based on fluorescence observed without primary antibody application (bottom graph). The percentage of co-expression for each panel is indicated at the upper right corner (purple). Representative experiment of 2 independent experiments.

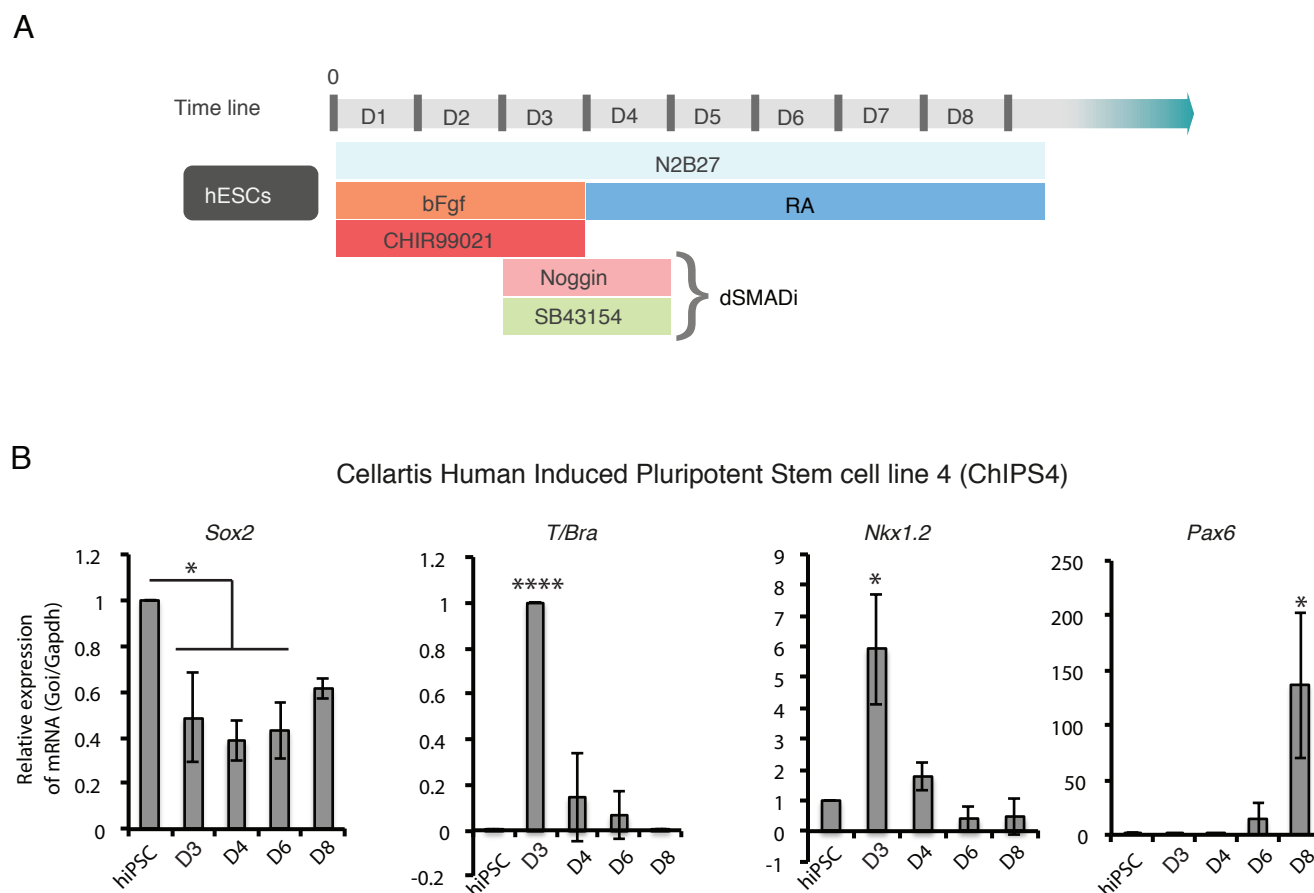

**Figure S3 Robust differentiation of spinal cord progenitors from NMP-like cells in an iPS cell line**

A. Schematic representation of the differentiation protocol used on the ChIPS4 cell line, including a dSMADi step from end of day 2 to end of day 4. B. Expression profile of selected genes over time in ChIPS4 cells submitted to the differentiation protocol presented in A. Graphs represent the expression of each individual gene normalized to *Gapdh* and relative to hiPSC levels. RTqPCR data represents average of 3 independent experiments, error bars SEM.

AACCTCCCTATAGGGGCGATTGGAGCTCCCGCGGTGCGGCCGCTCTAGAACTAGTG  
 GATCCCCCGGGCTGCAGCGACCAATGTGGAATTTCGCCCTT**AGTGGAAGCAAAAGACT**  
**GAGAGTC**CGGGATTTTCTCCCTCCGTTTCT**GAGACAGCAGGATGTACTAAAAAGCA**  
 CTGACTGGTCCAGTAGAAGACCGAGGTCCAAACCCAGACTCTGTCACCAACTCACAG  
 TGACCCTGGGGAAATCTTTTCTTACCTTTGAACCTCGATTTCCTCATCTTTAAACG  
 GGGACAGTGGTCTGTGCCACGTGACGCCCATCTCACAGGGATGCTCAAATAATCAAA  
 AGAGATCGTGCAAGCCTCAGGGCTTTGTGAACGCTAAACTGTGAGAACGTGAGGGAT  
 TTTACCTCCGAGGTAACCGGGTCTGAAGCTATTACAGTAATTCAGTGGCGGGGAAGG  
 AGATGCGCTGAGCATTGCCTGGGAGTAAGCAGTCCTGGCCTCAGTTGCATCCCCAAG  
 TCTAAGGCGGGTGCACCGGAGAAAGGGAACAACTCAAGTCACAGAGGTGTGTGTGT  
 CGGGGTGAGGGATCCCCGGGATGGAAGCCTCCCTCGCGCCCTCGGAGAGTCCAGAG  
 GGTGGGGCGGAGGCGCGCGGAGACGACAACACTGTCCCCGCGGTGCGCGCACCCGGG  
 CGCGCGGAGGCTTCCCCGAGCCCAGGCAAGCGGCCGCGGCACAGCGCCTGATAGTCC  
 CGAGGCTGGCCCCGGGCTGCGCCGGTGCCAATCGGCGCGCAGCCCCCGCGGCGCTCT  
 CCCCCCCCCGCTCCCCGCCCCCTCCCCAGCTTCACTTGGCAGCGCGGACCCGGCT  
 CCTGGCTGGAAAGCTACCGCCAAGCCACAGCCGAAGGCAAGCCCGAGCGGCGCCATC  
 CCAAACCCCGCG**CCGCGGACCGCGCGGCCCGTGGGC**GACGGGCATGGTGAGCAAGGGC  
**GAGGAGCTGTTACCGGGGTGGTGCCCATCCTGGTCGAGCTGGACGGCGACGTAAAC**  
**GGCCACAAGTTCAGCGTGTCCGGCGAGGGCGAGGGCGATGCCACCTACGGCAAGCTG**  
**ACCCTGAAGTTCATCTGCACCACCGGCAAGCTGCCCGTGCCCTGGCCACCCTCGTG**  
**ACCACCCTGACCTACGGCGTGCAGTGCTTCAGCCGCTACCCCGACCACATGAAGCAG**  
**CACGACTTCTTCAAGTCCGCCATGCCCGAAGGCTACGTCCAGGAGCGACCATCTTC**  
**TTCAAGGACGACGGCAACTACAAGACCCGCGCCGAGGTGAAGTTCGAGGGCGACACC**  
**CTGGTGAACCGCATCGAGCTGAAGGGCATCGACTTCAAGGAGGACGGCAACATCCTG**  
**GGGCACAAGCTGGAGTACAACATAACAGCCACAACGTCTATATCATGGCCGACAAG**  
**CAGAAGAACGGCATCAAGGTGAAGTTCAAGATCCGCCACAACATCGAGGACGGCAGC**  
**GTGCAGCTCGCCGACCACTACCAGCAGAACACCCCCATCGGCGACGGCCCCGTGCTG**  
**CTGCCCGACAACCACTACCTGAGCACCCAGTCCGCCCTGAGCAAAGACCCCAACGAG**  
**AAGCGCGATCACATGGTCTGCTGGAGTTCGTGACCGCCGCGGGATCACTCTCGGC**  
**ATGGACGAGCTGTACAAG**TCCGGAATCGGATCC**GAGGGCAGAGGAAGTCTTCTAACA**  
**TGCGGTGACGTGGAGGAGAATCCCGGCCA****CTGGCATGGCAAGATGGTGGTGCCAAG**  
**GCGGCTCCCTCCCACCACAAGATTTCTTTCTCTGTCTTGGACATCCTGGACCCACAG**  
**AAATTACCCGCGCAGCGCTCCCTGCCGTGCGCCCGGCTCCCCGGGAAGCCAGGAAA**  
**AGTTTGGCGGAGGTGGAAGCGGGGAAAGATGCCAGCTCCAGGGACCCTGTCCGACAG**  
**CTGGAGACCCCTGG**TAAGATGCAAGGCGGCCCCGCCCCAGGAGGCCTCAGCCCCAA  
 CAATGCGGAGTGTATGGGGGAACAGCCGGGCCCCGGTGAGTGGCCCTTAACAGCGTCT  
 TCCTCAGAGAGAAGGCGACGGGACCGGGTGCGAAGTGTAGCCCCCGCTCGGACTT  
 GGATAGAGGCAGAGAGGAGGCTCCCCGCATTACAGGGCAGGGATTTGCCGCATCCCT  
 GCTCACCCGCCAAGCTCACCCGCACCACAGTTCTGATGCTCGCGGTGGAAACTTACC  
 TGGCGCCTGTCTTGCCAGGCTTACTCATTTATCGGG**CATTTAATGCGCTTGCCACGT**  
**GCTAGGACCTGGGCTAAGGGCTGGGATAAAGGTGATGAAAACCTCGGAACCTGAGAG**  
**ATGGACAGCATCATTAACATCACCTCCATTTTATGGATGGGGGAGCTGACGCTAAGG**  
 CTTGCGCCGGGGGTCTTCTGTGAGTAGCGAGGTGAGGTGCCACCCGAGACGCCTGCG  
 GGGCTGGGCTGCCCCAGGC**GCTCAAGCTCCCCAGACTCAAC**TGCCCGCTACCTCGAG  
 GCGGCCACGCCGCGAGATCTTGATCACCTAGGGGGCCCGACGTCGCTGGTTACACC  
 TTAAGCGGGAA

Legend:

Plamid sequence

Primers used for cloning

gRNA (antisense and sense)

GFP sequence

T2A sequence

**Nkx1.2 Exon1**

repeats

Figure S4

**Sequencing of the GFP-T2A insertion site in the correctly targeted clone used in this study.** Grey: plasmid sequence, highlighted yellow: Primers used for cloning, highlighted blue: gRNA (antisense and sense), highlighted green: GFP sequence, orange: T2A sequence, bold black: Nkx1.2 Exon1, peach: repetitive sequences.

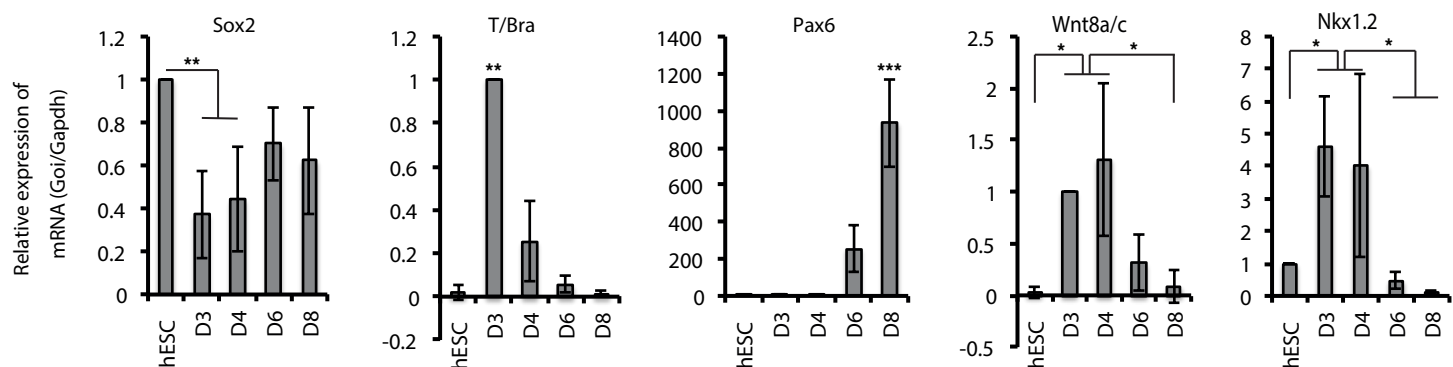

**Figure S5 Differentiation evaluation of the GFP-Nkx1.2 clone used in this study**

Expression of selected marker genes was analyzed by RTqPCR during differentiation of the GFP-Nkx1.2 line following the protocol presented Figure 1B. Graphs represent the expression of each individual gene normalized to *Gapdh* and relative to hESC levels. Average of 3 independent RTqPCR experiments, error bars are SEM.

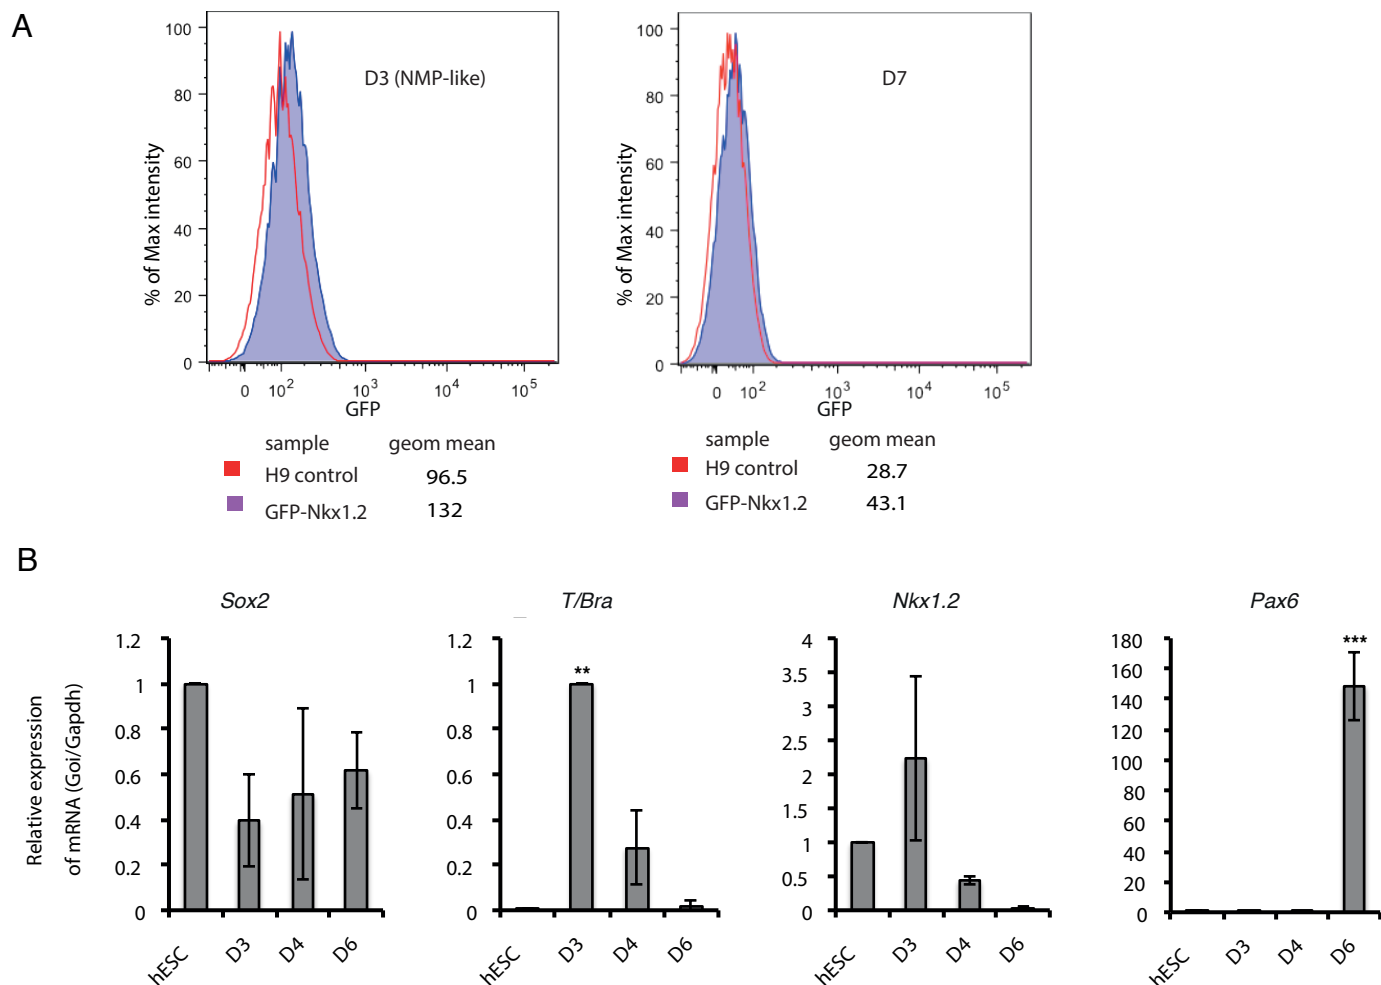

**Figure S6 GFP expression and differentiation profile of a second correctly targeted GFP-Nkx1.2 clone**

A. Flow cytometry analysis of GFP expression at D3 (NMP-like) and D7 of the differentiation protocol. % of maximum intensity for GFP channel is plotted, geometric mean for each peak is indicated. B. Expression of selected marker genes analyzed by RTqPCR during differentiation of the second GFP-Nkx1.2 clone following the protocol presented Figure 1B. Graphs represent the expression of each individual gene normalized to *Gapdh* and relative to hESC levels. Average of 3 independent RTqPCR experiments, error bars are SEM.

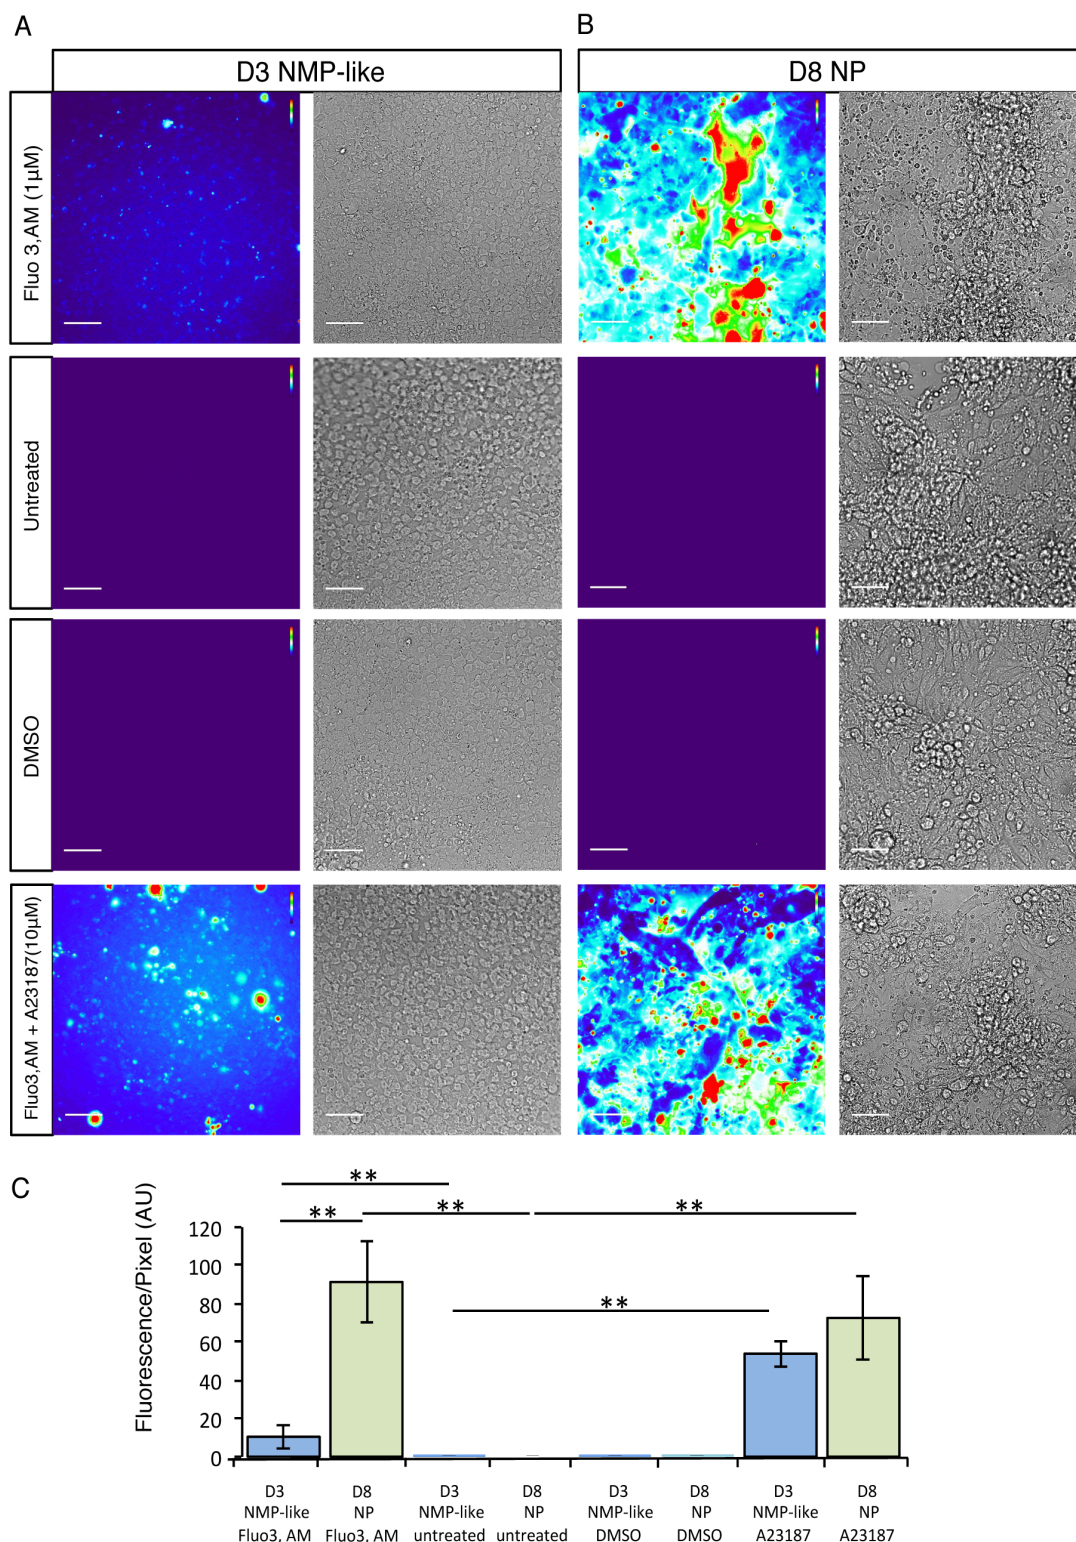

Figure S7 Calcium signalling increases as NMP-like cells differentiate into neural progenitors

Calcium signalling was assessed using Fluo-3, AM in D3 NMP-like cells and in D8 neural progenitors (NP). A. D3 NMP-like cells exposed to  $\text{Ca}^{2+}$  indicator, Fluo-3, AM (in DMSO/medium), medium alone, medium with vehicle DMSO alone, or the calcium ionophore A23187 in the presence of Fluo-3, AM; B. D8 NPs treated with Fluo-3, AM (in DMSO), medium alone, medium with vehicle DMSO alone, or the calcium ionophore A23187 in the presence of Fluo-3, AM. Green emission of Fluo-3, AM excited at 488 nm has been pseudo-coloured and presented as a heat-map using the HeatMap Histogram plugin for Image J (red=high and blue=low fluorescence); C): Quantification and comparison of calcium fluorescence in D3 NMP-like cells and D8 NPs exposed to Fluo-3, AM, medium alone, medium with DMSO or the calcium ionophore A23187 in presence of Fluo-3, AM. Quantification was made using the total fluorescence intensity from 3 images for each condition from 4 independent experiments. Data were analysed using the non-parametric Mann-Whitney test with Graphpad Prism V6. Error bars are  $\pm$  standard deviations. p-value  $^{**}p < 0.01$ . Scale bar = 50  $\mu\text{m}$ . These data show that calcium signalling is higher in D8 neural progenitors in comparison with D3 NMP-like cells from which they are derived.



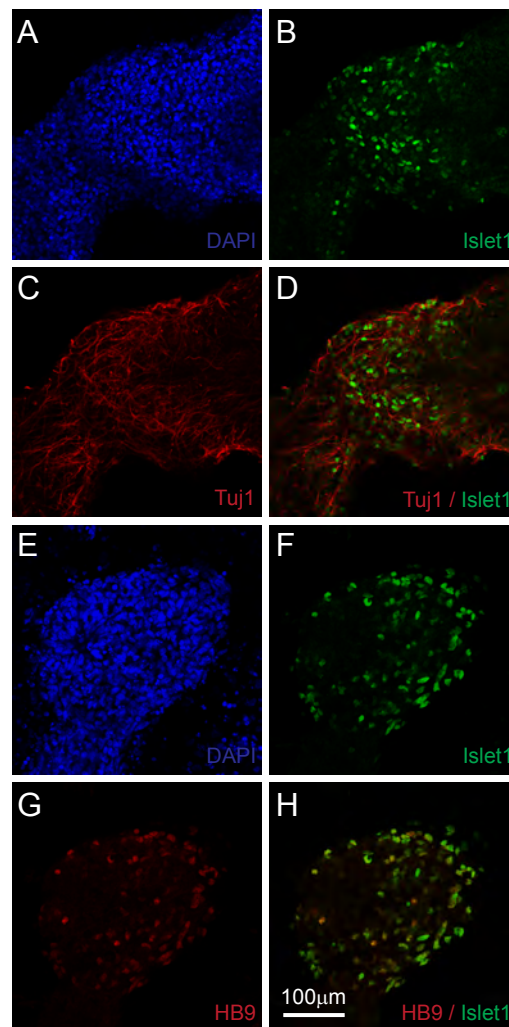

**Figure S8 Motorneuron differentiation from hESC derived NMP-like cells**

H9 ES cells were differentiated into neuromesodermal progenitor-like cells as in Fig1B and then differentiated towards motor neurons as described in the Methods. Nuclei were stained with DAPI (A and E), and labelled with antibodies against Islet1 (B,D,F and H), beta-III-tubulin (C and D) and HB9 (G and H). Motorneurons were identified as cells co-expressing HB9 and Islet1 (Amoroso et al. 2013). Images are representative of cells cultured using this protocol in 3 independent experiments starting from the hES cell state. Scale bar = 100 µm



## Supplementary data 1

### Quality control and passage numbers for pluripotent cells used in this study

H9 (WA09) hES cells were purchased from Wicell and were supplied at passage 24. The cells were thawed transferred to DEF-CS and cell banks prepared at passage 29. For routine production the cells were used between passage 29 and 39.

SA121 hES cells were purchased from Cellartis AB and were supplied at passage 9. The cells were thawed and cell banks prepared at passage 13. For routine production the cells used between passage 13 and 23.

ChiPS4 hiPS cells were purchased from Cellartis AB and were supplied at passage 9. The cells were thawed and cell banks prepared at passage 13. For routine production the cells used between passage 13 and 23.

For making the Nkx1.2 GFP knock in line H9 (WA09) cells were transfected at passage 33 and monoclonal cell lines banked at passage 40. For routine production the cells used between passage 40 and 50

For quality control purposes, representative lots of each cell bank were thawed and tested for post-thaw viability, and to ensure sterility and absence mycoplasma contamination. After 2 passages the cell lines were tested for the expression of pluripotency markers (Oct4, Sox2, Nanog, SSEA-3, SSEA-4, TRA-1-60 and TRA-1-81) and differentiation markers (SSEA-1, HNF-3 beta, beta-III-tubulin and smooth muscle alpha-actinin) by immunofluorescence, and the ability to form all three germ layers when embryoid bodies are allowed to spontaneously differentiate in culture (immunofluorescence for HNF-3 beta, beta-III-tubulin and smooth muscle alpha-actinin).

## Table S1.

List of genes specifically enriched in human NMP-like cells.

Human NMP-like genes (Fig. 3A) were determined by selection of RNAseq data using criteria indicated in the methods section (at least 10 read counts in D3(NMP-like), significantly enriched (p value < 0.01) in D3(NMP-like) compared to both hESC and hD8 samples, with a foldchange >2). Using these criteria, 1348 genes were identified as highly expressed in human NMP-like cells (D3). Full list including information on the 1348 hNMP-like genes are included in sheet 1. Sheet 2 contains the selected dataset used to make figure 3A. Both tables present for each gene: gene names and description, mean read counts from independent experiments in hESC, D3(NMP-like) and D8, fold change between (D3)NMP-like and hESC conditions (FC NMP-like/hESC), fold change between (D3)NMP-like and D8 conditions (FC NMP-like/D8), and p-values associated (p\_hECS.NMPlike, p\_NMPlike.D8, p\_hESC.D8).

[Click here to Download Table S1](#)
